# Supplementary material for: N-Heterocyclic carbene catalyzed conjugate umpolung reactions leading to coumarin derivatives
Source: Royal Society of Chemistry journal article supplement (doi:10.1039/c1ra00916h), 2011-12-20

## Supplementary information

# N-Heterocyclic Carbene Catalyzed Conjugate Umpolung Reactions Leading to Coumarin Derivatives

Yuansong Jiang, Wanzhi Chen,\* and Weimin Lu\*

Department of Chemistry, Zhejiang University, Xixi Campus, Hangzhou 310028,  
People's Republic of China.

### Contents

|                      |                                                                                               |
|----------------------|-----------------------------------------------------------------------------------------------|
| Page S3:             | <sup>1</sup> H NMR and <sup>13</sup> C NMR spectra of compound <b>4a</b>                      |
| Page S4:             | <sup>1</sup> H NMR and <sup>13</sup> C NMR spectra of compound <b>4b</b>                      |
| Page S5:             | <sup>1</sup> H NMR and <sup>13</sup> C NMR spectra of compound <b>4c</b>                      |
| Page S6:             | <sup>1</sup> H NMR and <sup>13</sup> C NMR spectra of compound <b>4d</b>                      |
| Page S7:             | <sup>1</sup> H NMR and <sup>13</sup> C NMR spectra of compound <b>4e</b>                      |
| Page S8:             | <sup>1</sup> H NMR and <sup>13</sup> C NMR spectra of compound <b>4f</b>                      |
| Page S9:             | <sup>1</sup> H NMR and <sup>13</sup> C NMR spectra of compound <b>4g</b>                      |
| Page S10 – Page S11: | <sup>1</sup> H NMR, <sup>13</sup> C NMR and <sup>19</sup> F NMR spectra of compound <b>4h</b> |
| Page S12:            | <sup>1</sup> H NMR and <sup>13</sup> C NMR spectra of compound <b>4i</b>                      |
| Page S13:            | <sup>1</sup> H NMR and <sup>13</sup> C NMR spectra of compound <b>4j</b>                      |
| Page S14:            | <sup>1</sup> H NMR and <sup>13</sup> C NMR spectra of compound <b>4k</b>                      |
| Page S15:            | <sup>1</sup> H NMR and <sup>13</sup> C NMR spectra of compound <b>4l</b>                      |
| Page S16:            | <sup>1</sup> H NMR and <sup>13</sup> C NMR spectra of compound <b>4m</b>                      |
| Page S17:            | <sup>1</sup> H NMR and <sup>13</sup> C NMR spectra of compound <b>4n</b>                      |
| Page S18:            | <sup>1</sup> H NMR and <sup>13</sup> C NMR spectra of compound <b>4o</b>                      |

Page S19:  $^1\text{H}$  NMR and  $^{13}\text{C}$  NMR spectra of compound **4p**

Page S20:  $^1\text{H}$  NMR and  $^{13}\text{C}$  NMR spectra of compound **4q**

Page S21:  $^1\text{H}$  NMR and  $^{13}\text{C}$  NMR spectra of compound **4r**

Page S22:  $^1\text{H}$  NMR and  $^{13}\text{C}$  NMR spectra of compound **7a**

Page S23:  $^1\text{H}$  NMR and  $^{13}\text{C}$  NMR spectra of compound **7b**

Page S24:  $^1\text{H}$  NMR and  $^{13}\text{C}$  NMR spectra of compound **7c**

Page S25:  $^1\text{H}$  NMR and  $^{13}\text{C}$  NMR spectra of compound **7d**

Page S26:  $^1\text{H}$  NMR and  $^{13}\text{C}$  NMR spectra of compound **7e**

Page S27:  $^1\text{H}$  NMR and  $^{13}\text{C}$  NMR spectra of compound **7f**

### 3-Benzyl-2H-chromen-2-one (4a)

$^1\text{H}$  NMR (400 MHz,  $\text{CDCl}_3$ )

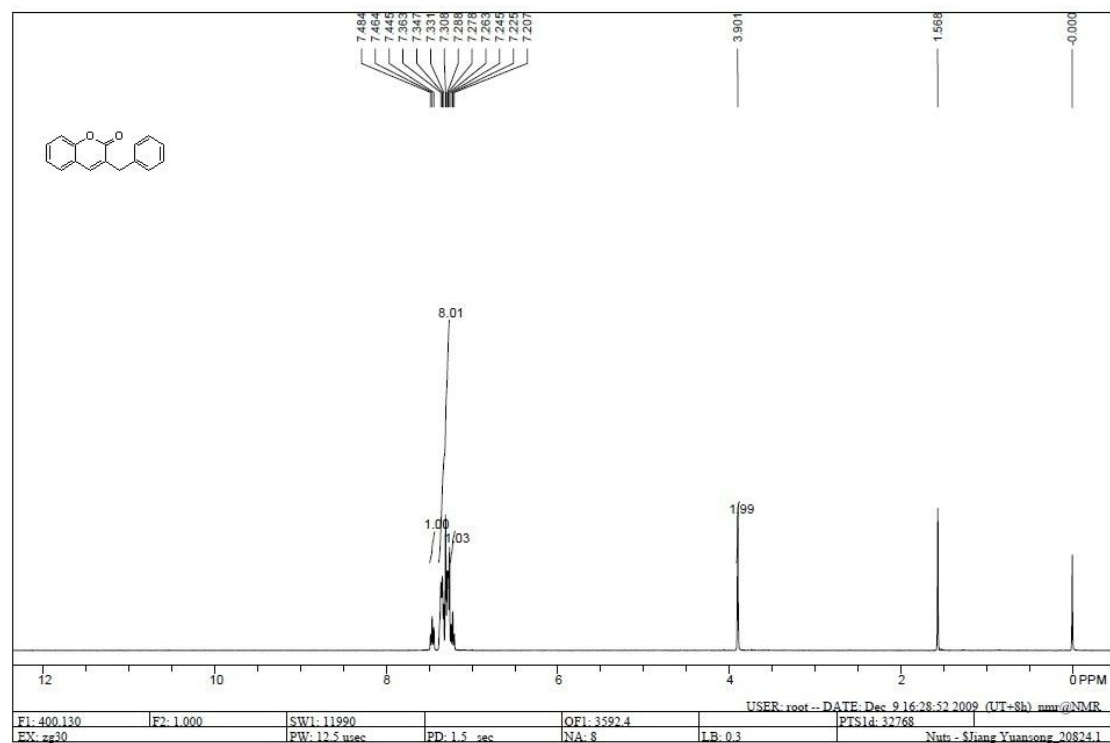

$^{13}\text{C}$  NMR (100 MHz,  $\text{DMSO}-d_6$ )

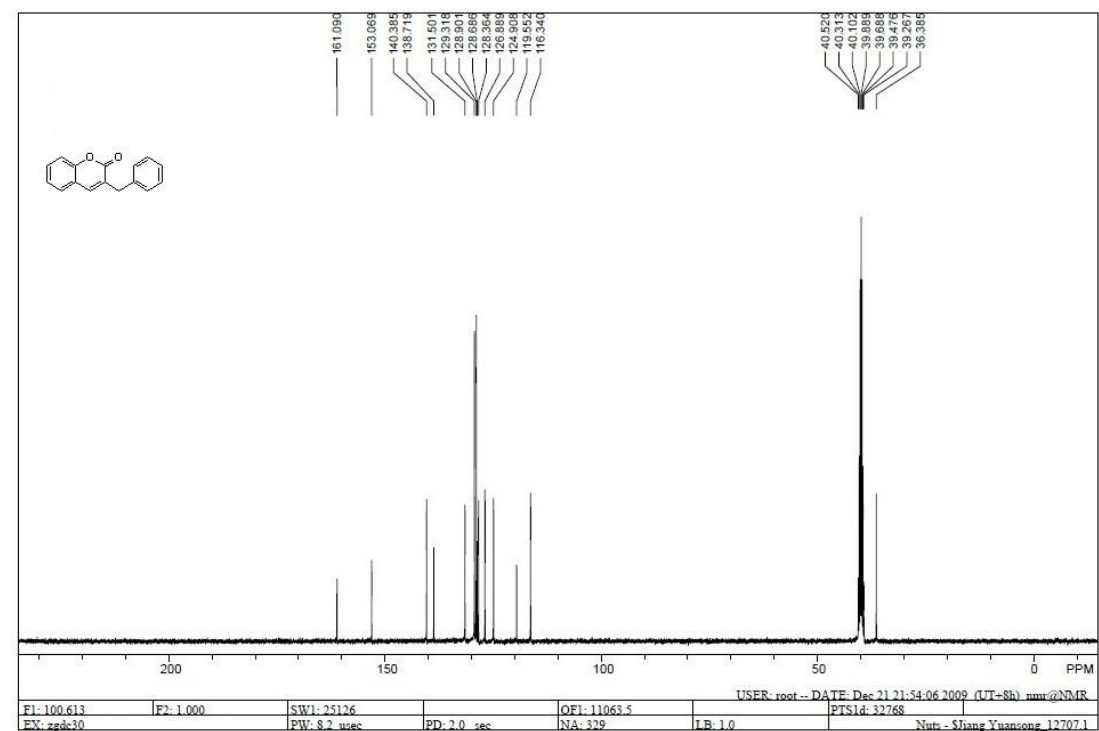

### 3-(2-Methoxybenzyl)-2H-chromen-2-one (4b)

<sup>1</sup>H NMR (400 MHz, CDCl<sub>3</sub>)

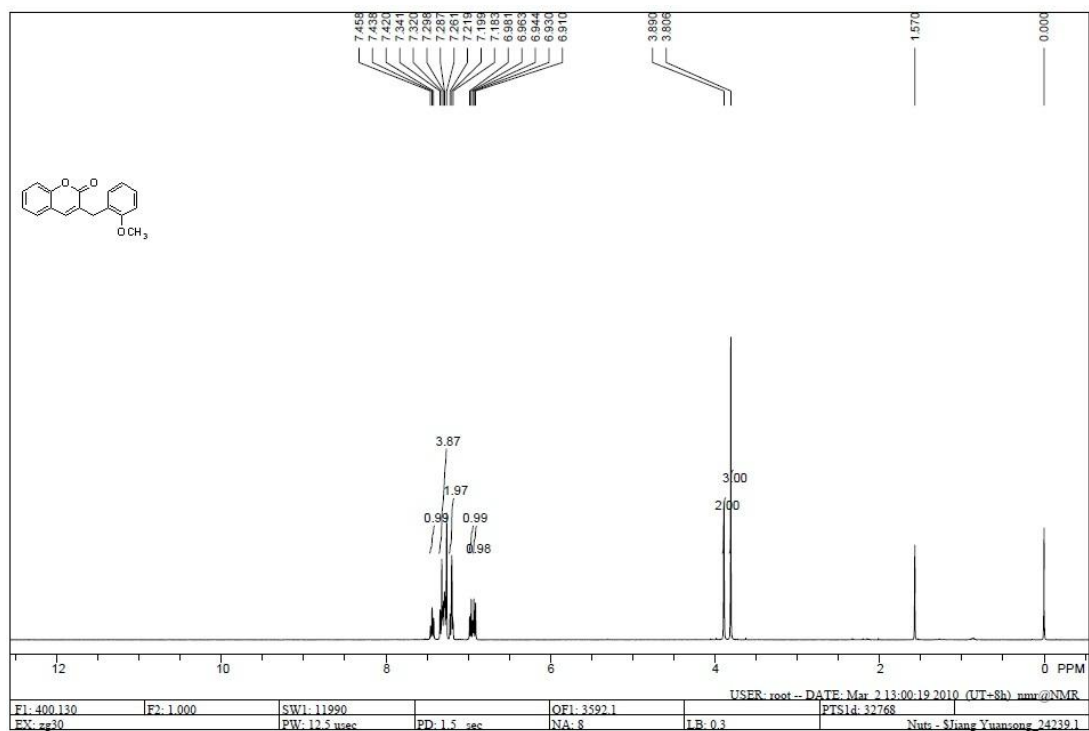

<sup>13</sup>C NMR (100 MHz, CDCl<sub>3</sub>)

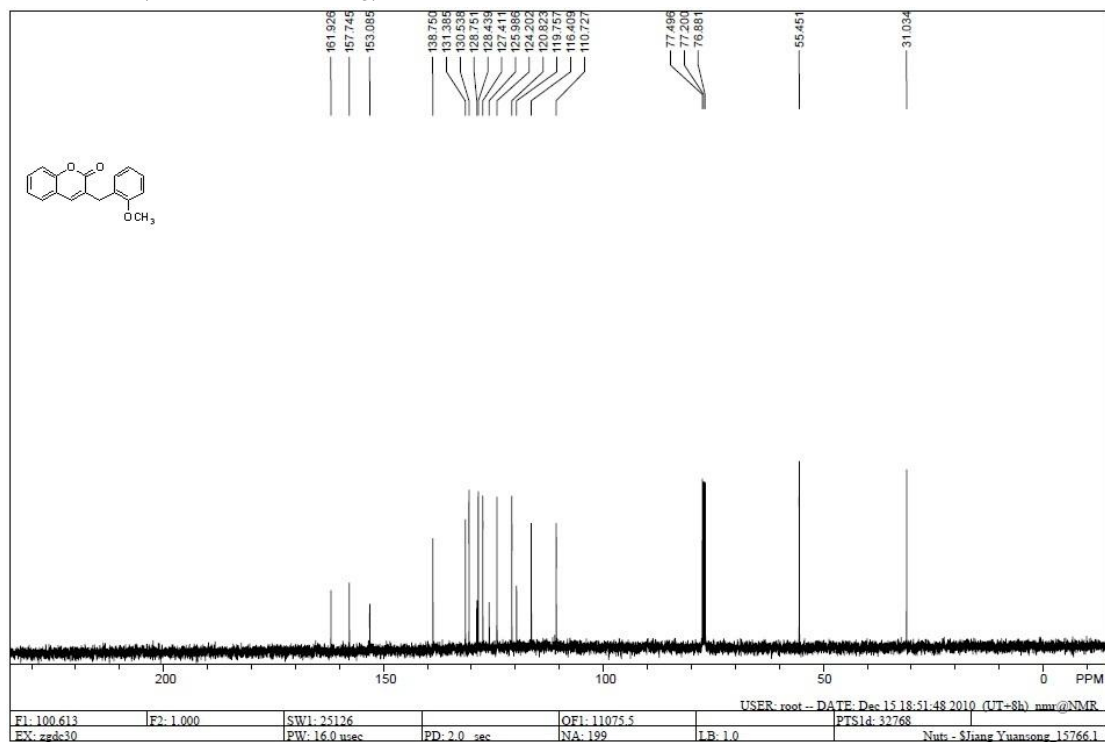

### 3-(3-Methoxybenzyl)-2H-chromen-2-one (4c)

<sup>1</sup>H NMR (400 MHz, CDCl<sub>3</sub>)

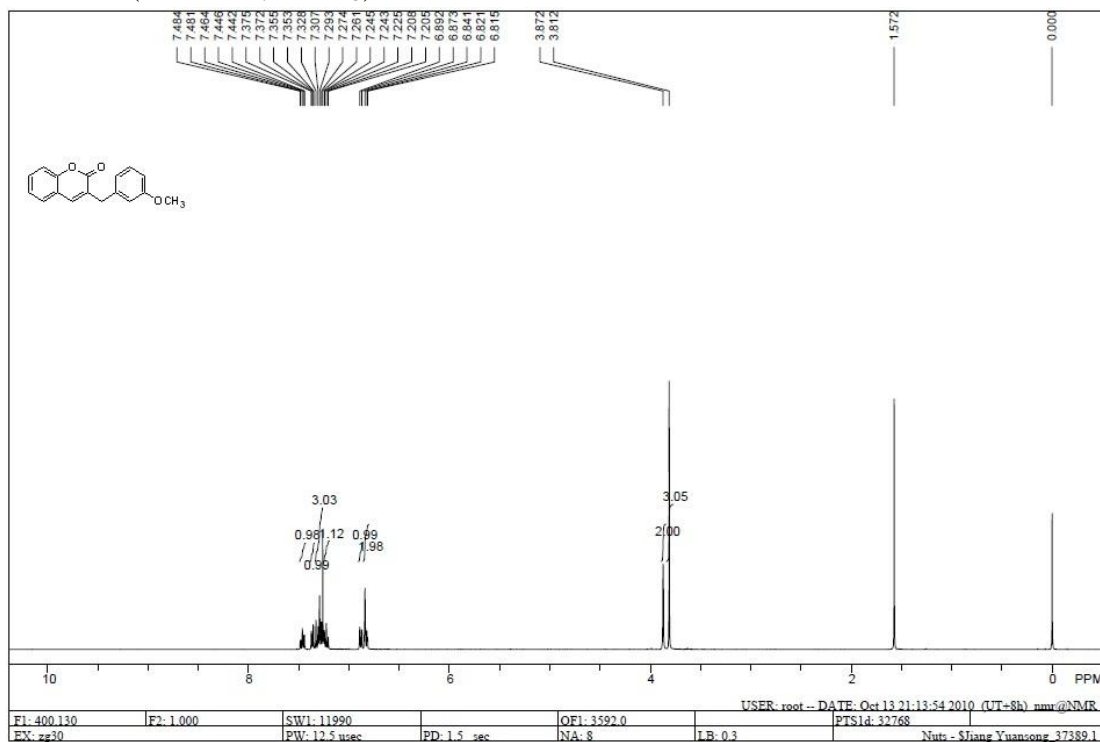

<sup>13</sup>C NMR (100 MHz, CDCl<sub>3</sub>)

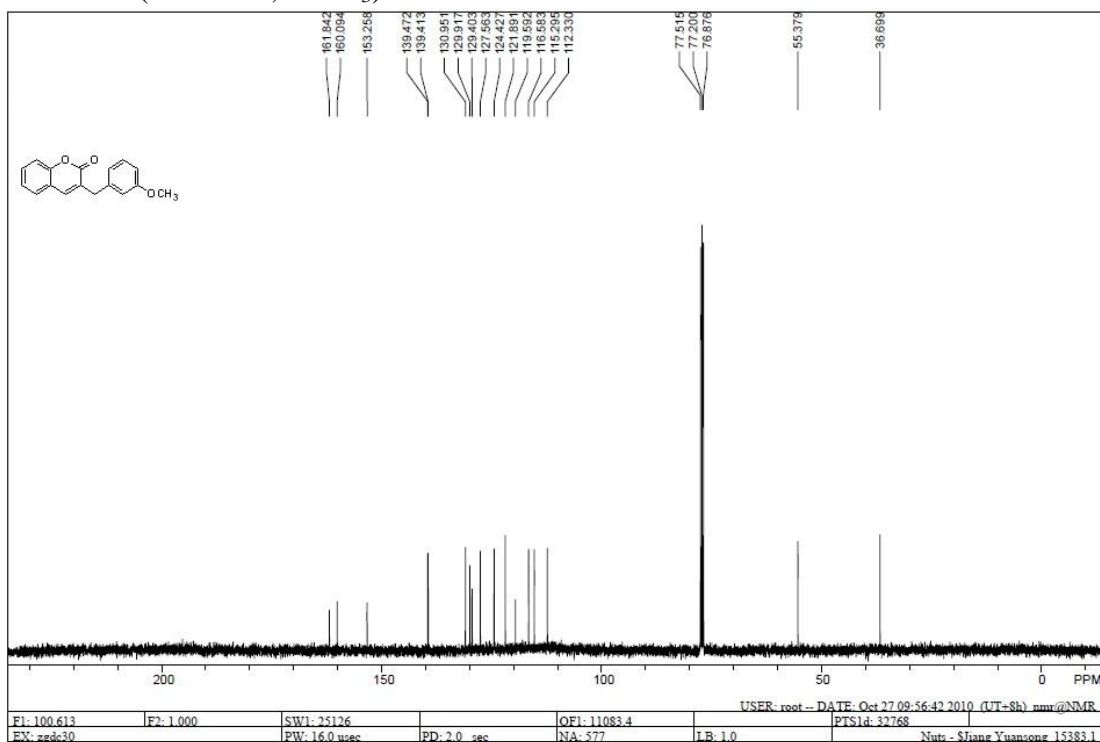

### 3-(4-Methoxybenzyl)-2H-chromen-2-one (4d)

<sup>1</sup>H NMR (400 MHz, CDCl<sub>3</sub>)

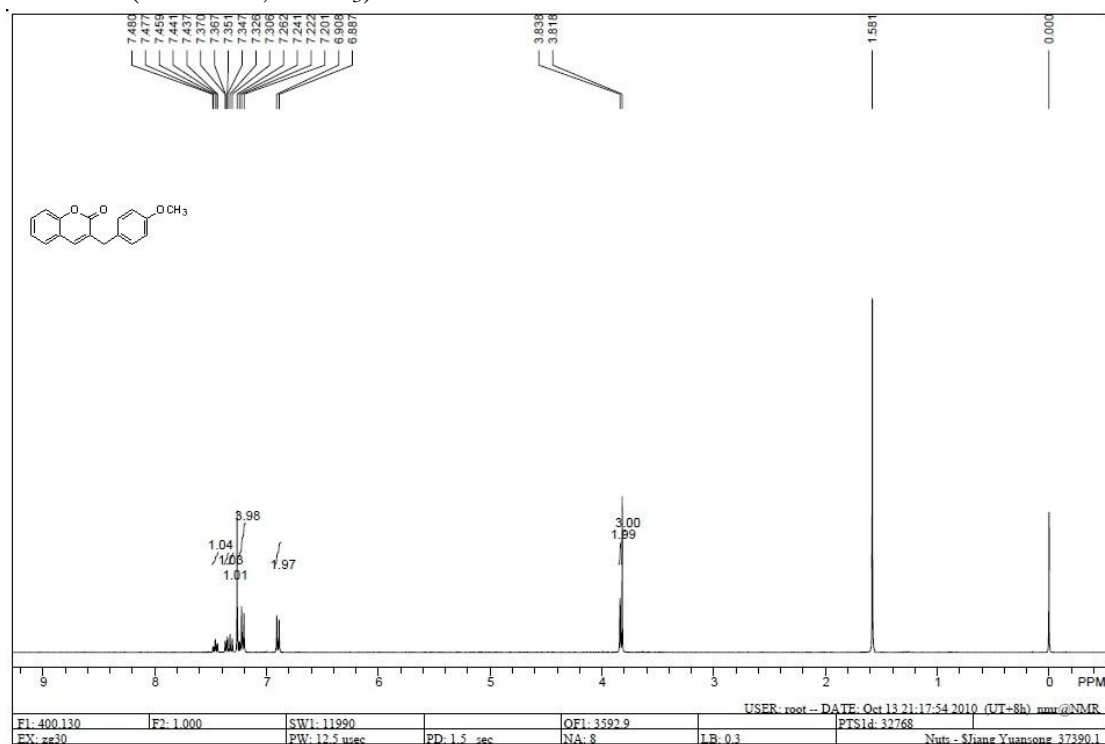

<sup>13</sup>C NMR (100 MHz, CDCl<sub>3</sub>)

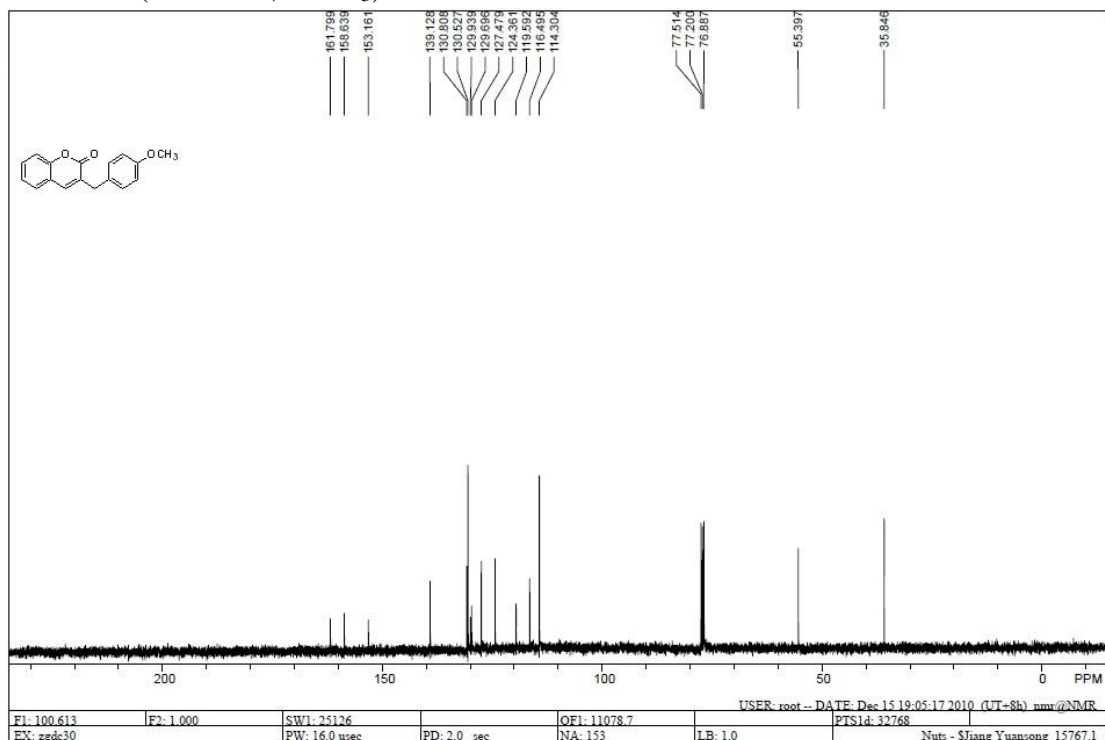

### 3-(4-(Dimethylamino)benzyl)-2H-chromen-2-one (4e)

<sup>1</sup>H NMR (400 MHz, DMSO-*d*<sub>6</sub>)

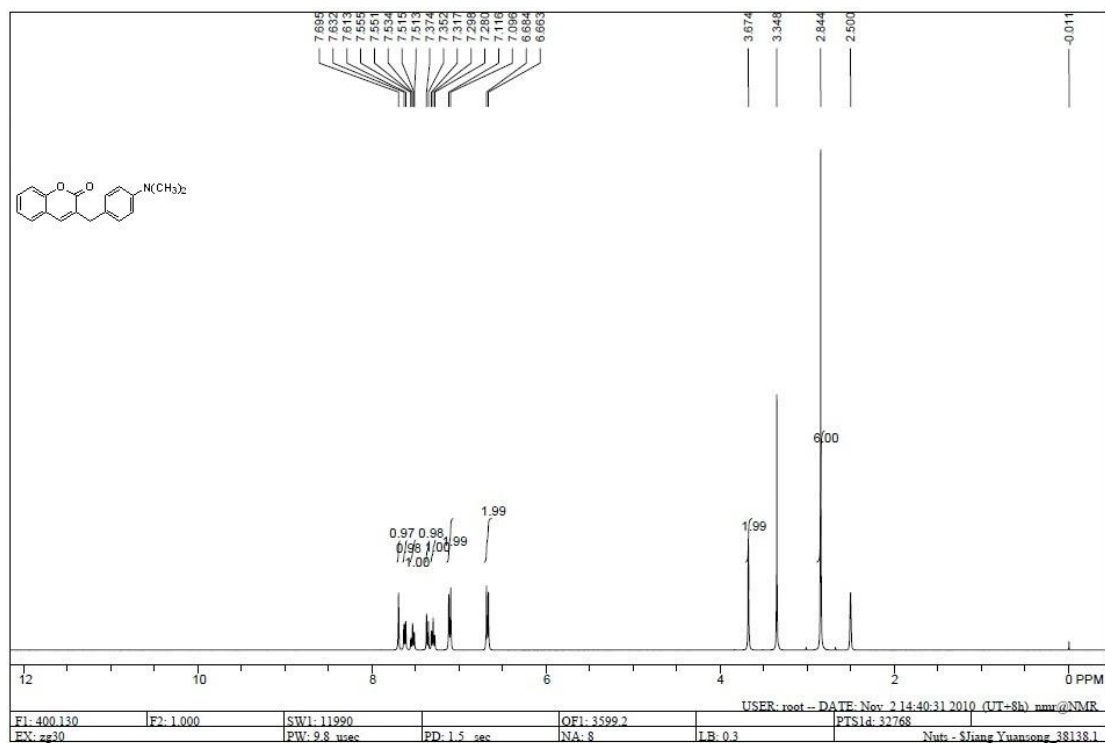

<sup>13</sup>C NMR (100 MHz, DMSO-*d*<sub>6</sub>)

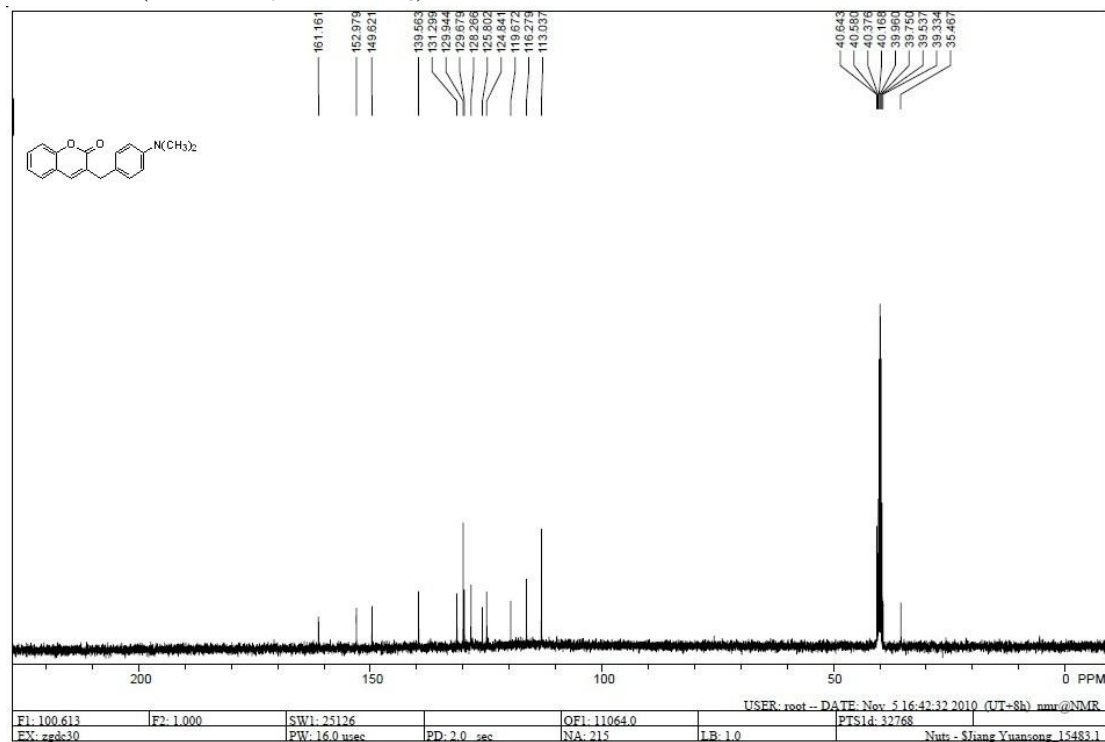

### 3-(4-Methylbenzyl)-2H-chromen-2-one (4f)

<sup>1</sup>H NMR (400 MHz, CDCl<sub>3</sub>)

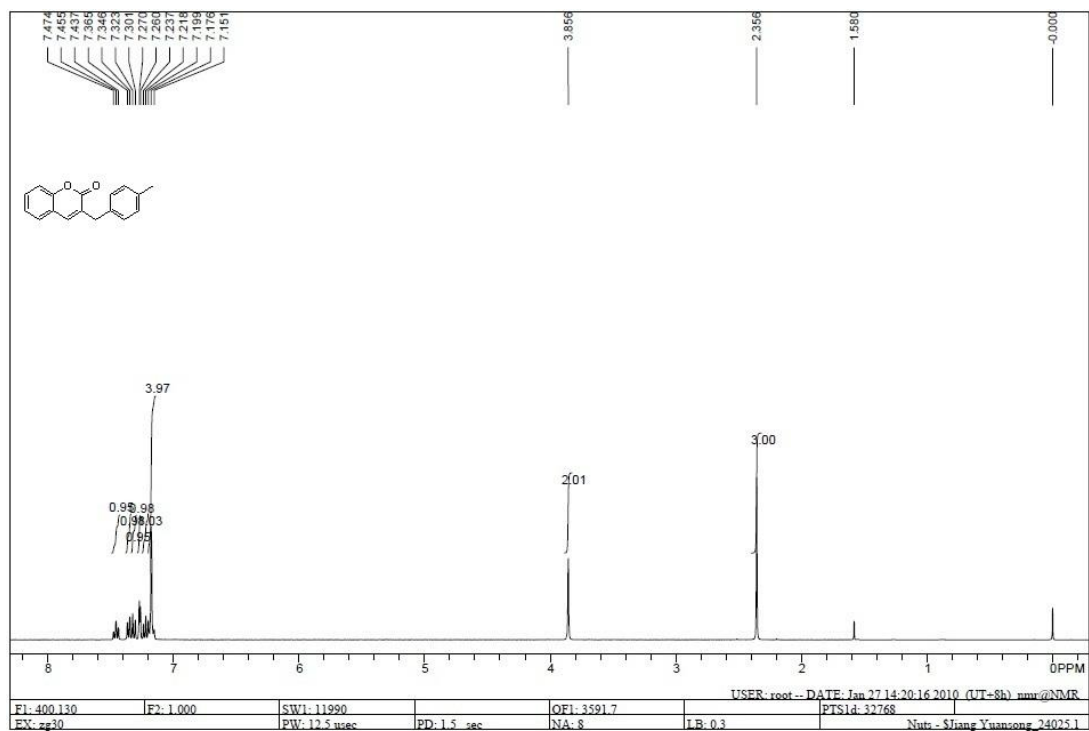

<sup>13</sup>C NMR (100 MHz, CDCl<sub>3</sub>)

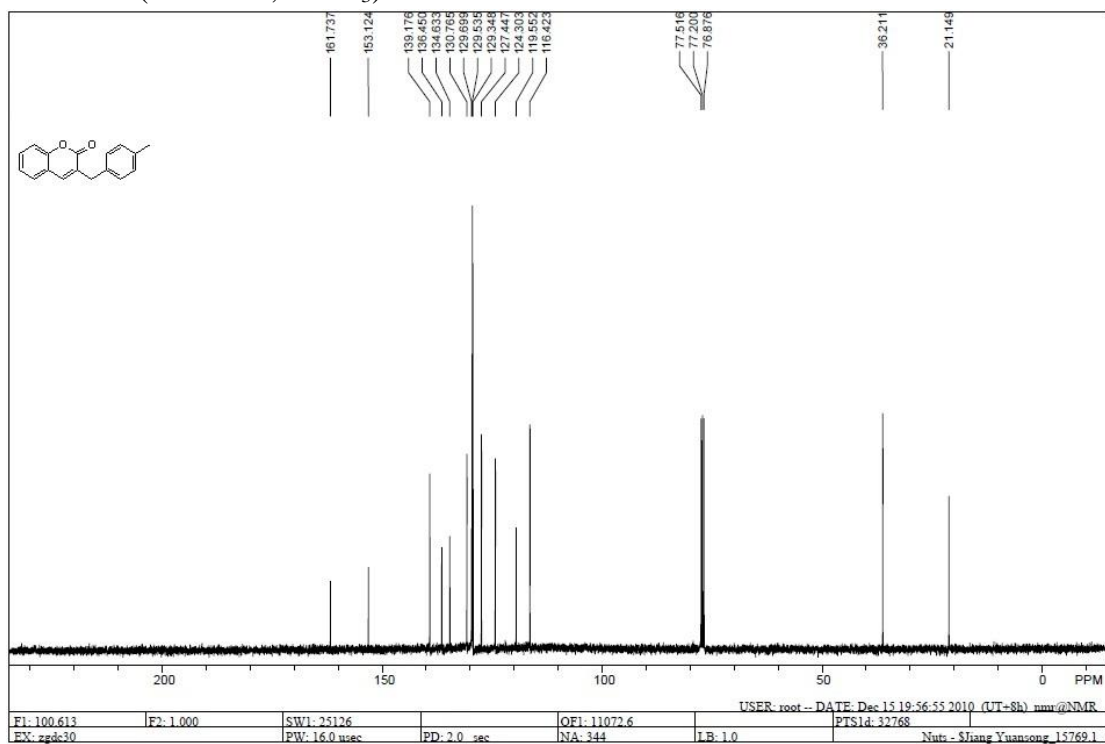



### 3-(4-Chlorobenzyl)-2H-chromen-2-one (4g)

$^1\text{H}$  NMR (400 MHz,  $\text{CDCl}_3$ )

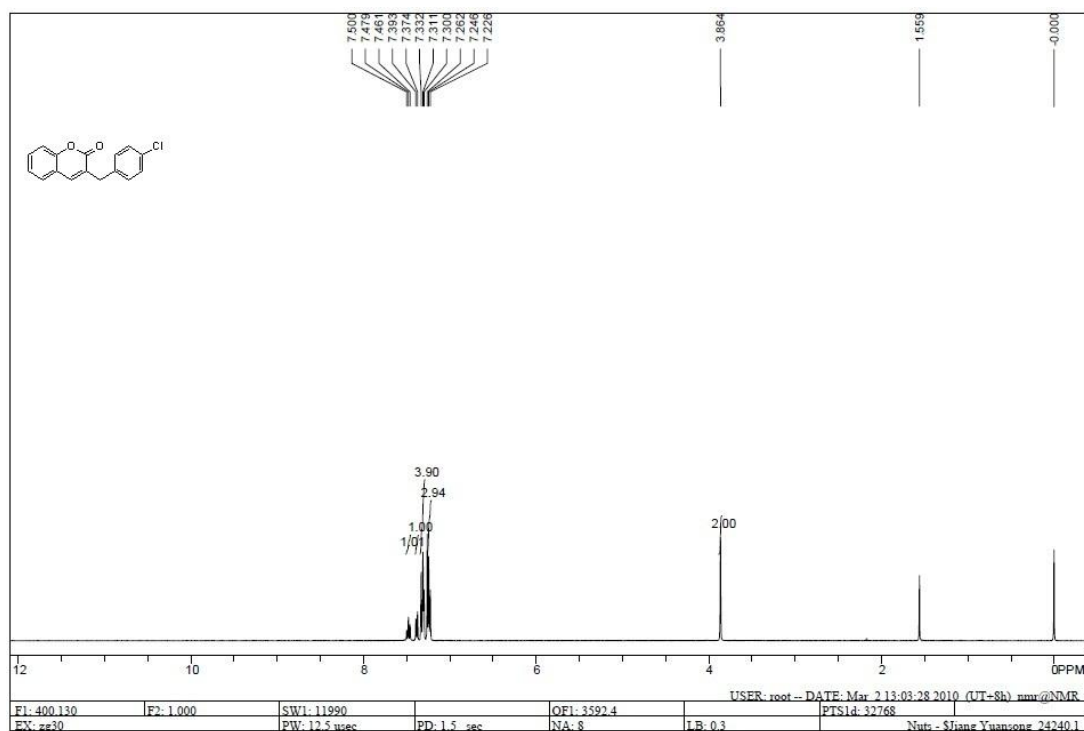

$^{13}\text{C}$  NMR (100 MHz,  $\text{CDCl}_3$ )

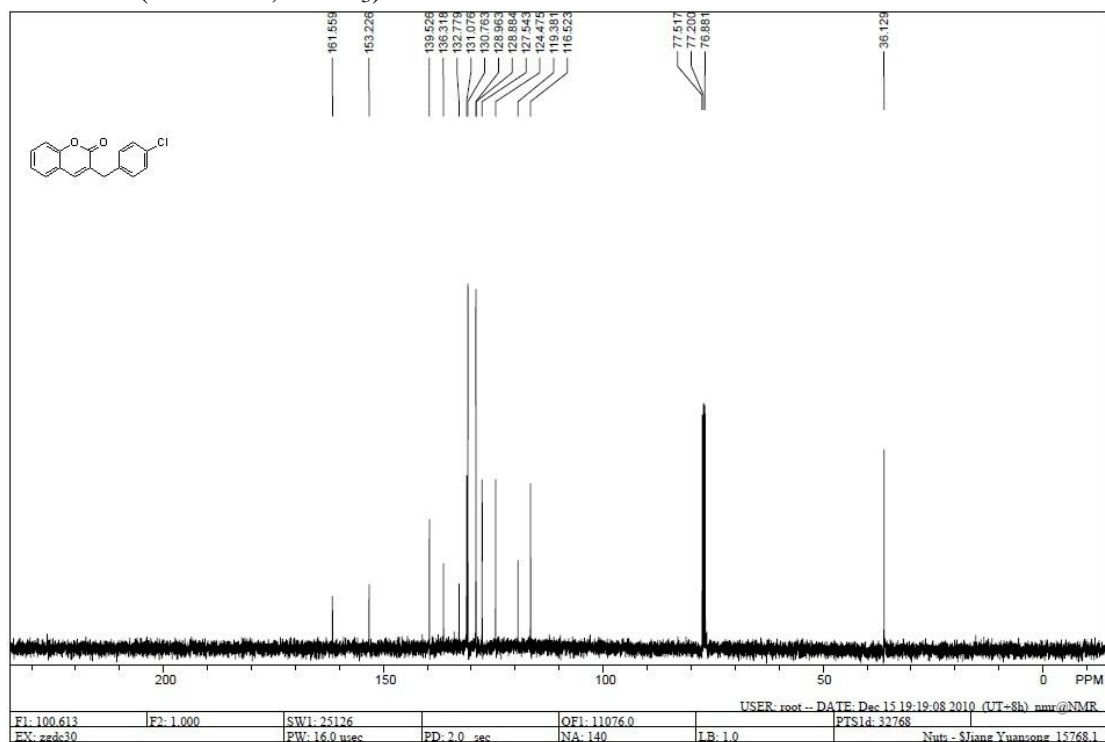

### 3-(4-(Trifluoromethyl)benzyl)-2H-chromen-2-one (4h)

<sup>1</sup>H NMR (400 MHz, CDCl<sub>3</sub>)

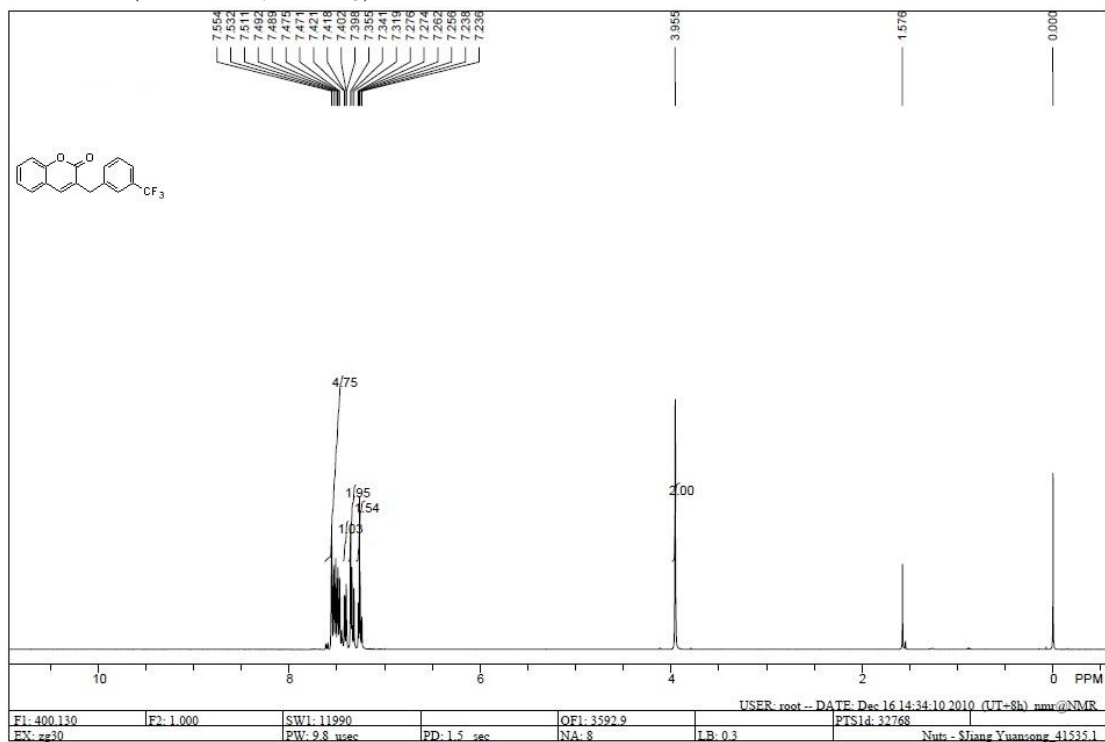

<sup>13</sup>C NMR (100 MHz, CDCl<sub>3</sub>)

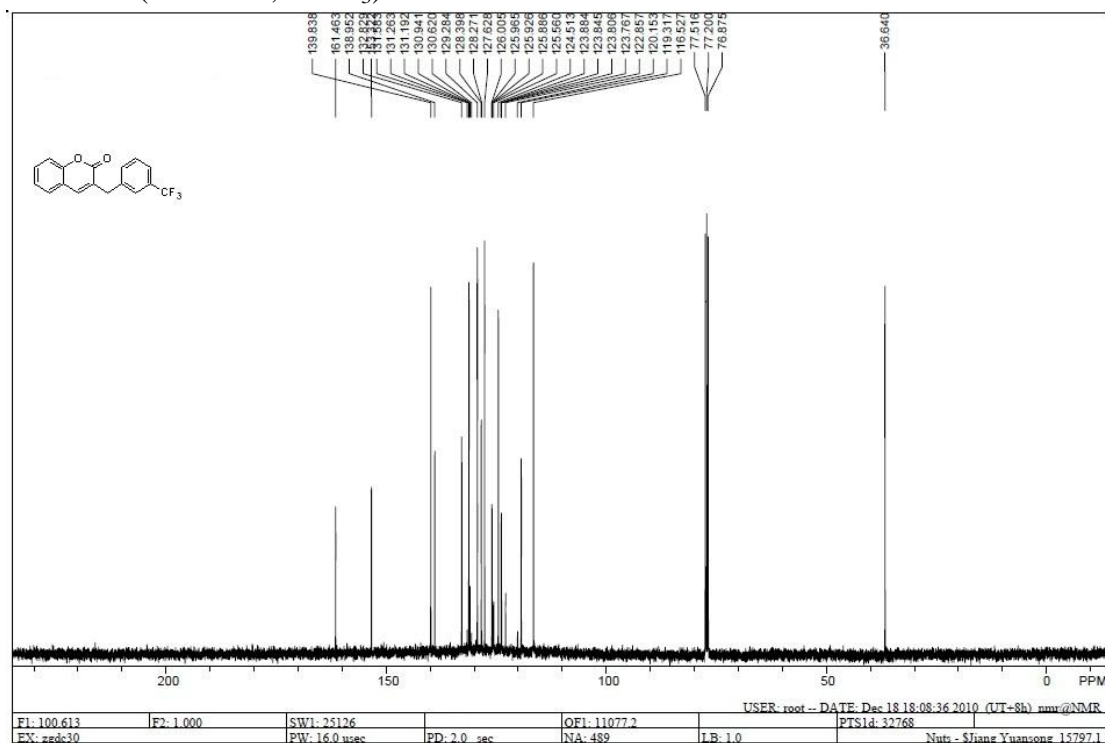

<sup>19</sup>F NMR (470 MHz, CDCl<sub>3</sub>)

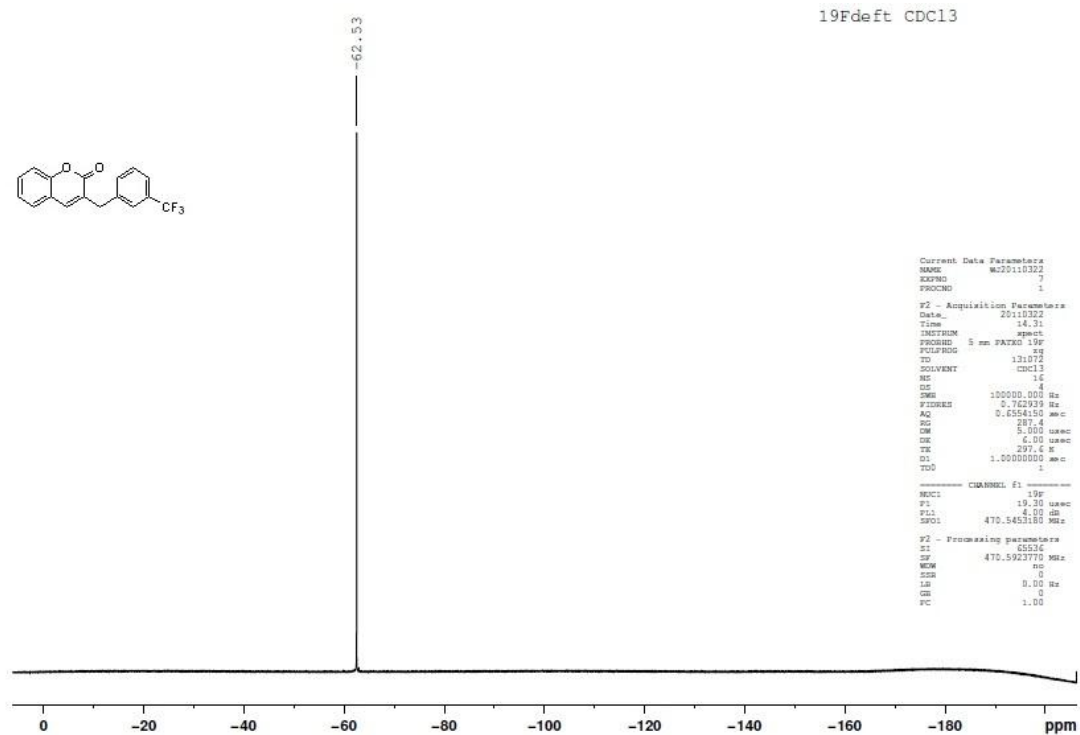

### 3-Benzyl-6-methoxy-2H-chromen-2-one (4i)

$^1\text{H}$  NMR (400 MHz,  $\text{CDCl}_3$ )

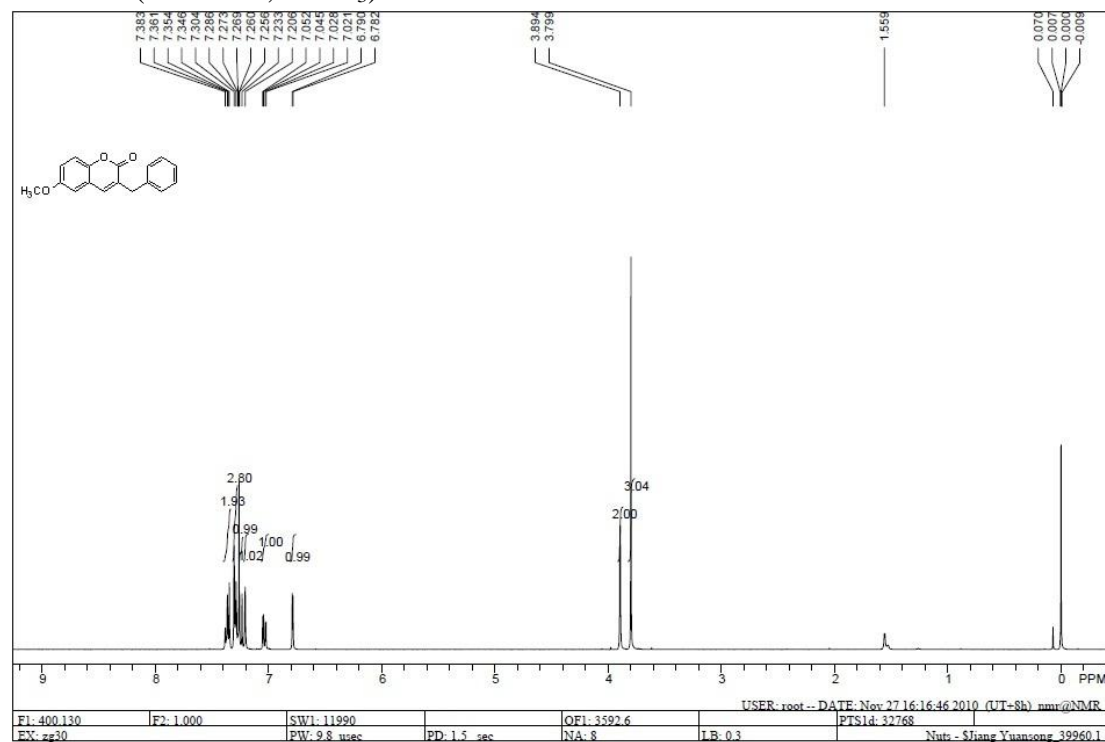

$^{13}\text{C}$  NMR (100 MHz,  $\text{CDCl}_3$ )

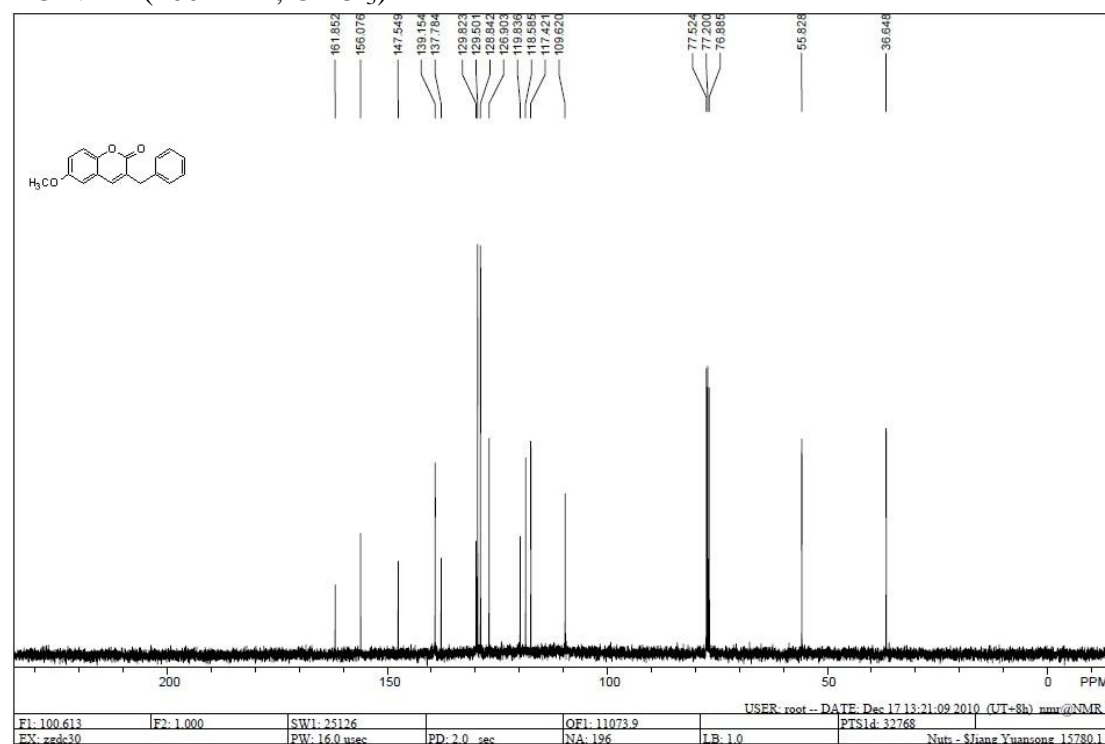

### 3-Benzyl-7-methoxy-2H-chromen-2-one (4j)

$^1\text{H}$  NMR (400 MHz,  $\text{CDCl}_3$ )

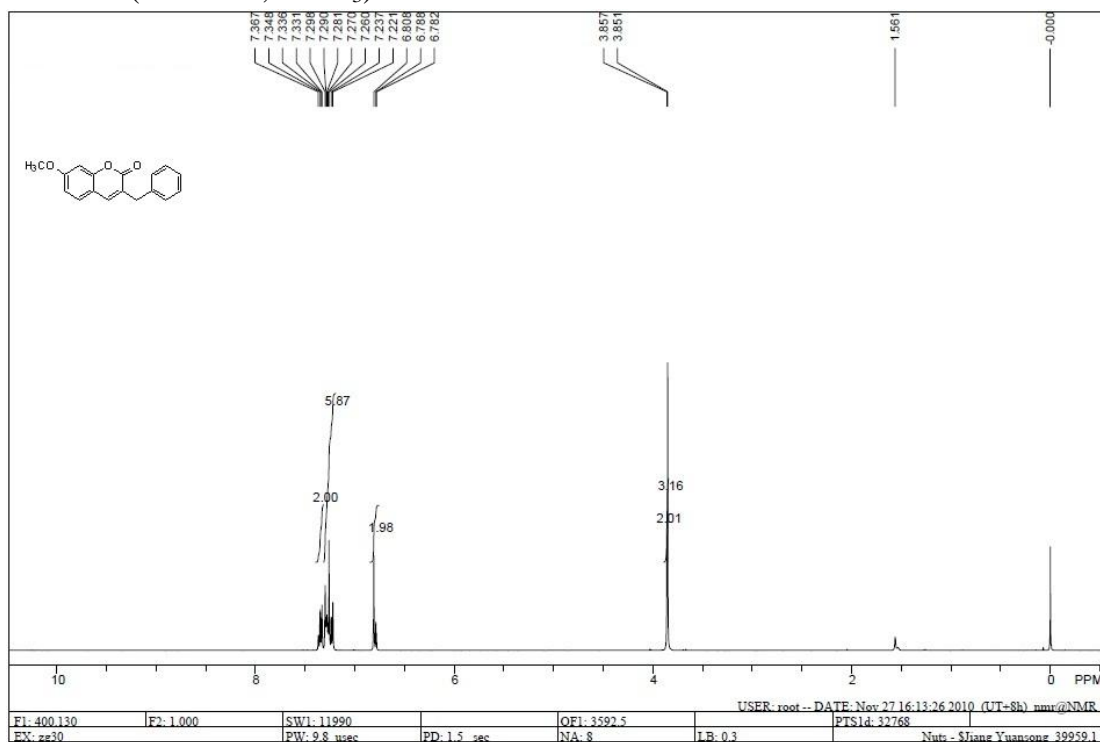

$^{13}\text{C}$  NMR (100 MHz,  $\text{CDCl}_3$ )

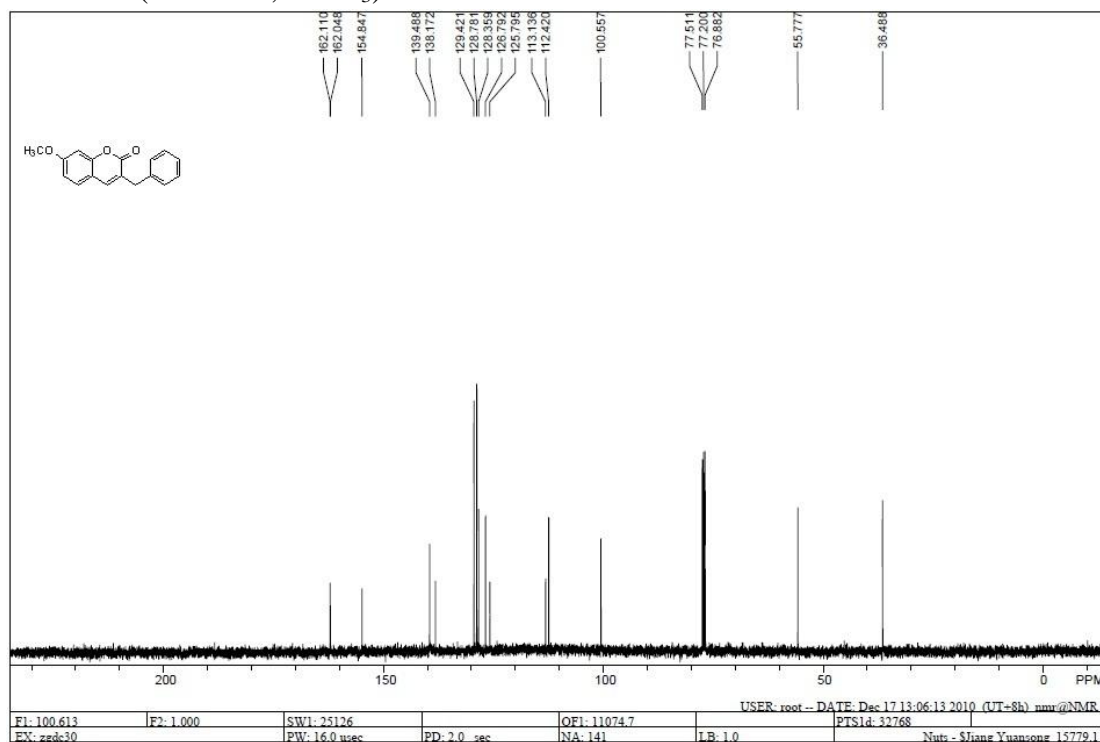

### 3-Benzyl-8-methoxy-2H-chromen-2-one (4k)

$^1\text{H}$  NMR (400 MHz,  $\text{CDCl}_3$ )

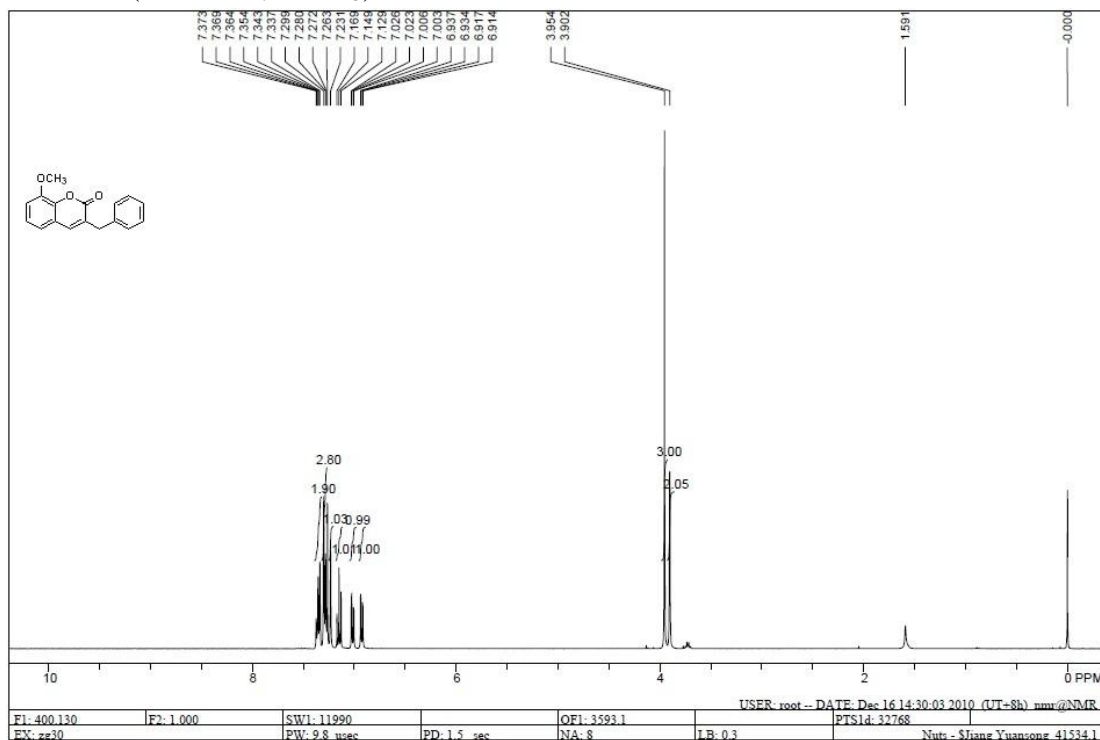

$^{13}\text{C}$  NMR (100 MHz,  $\text{CDCl}_3$ )

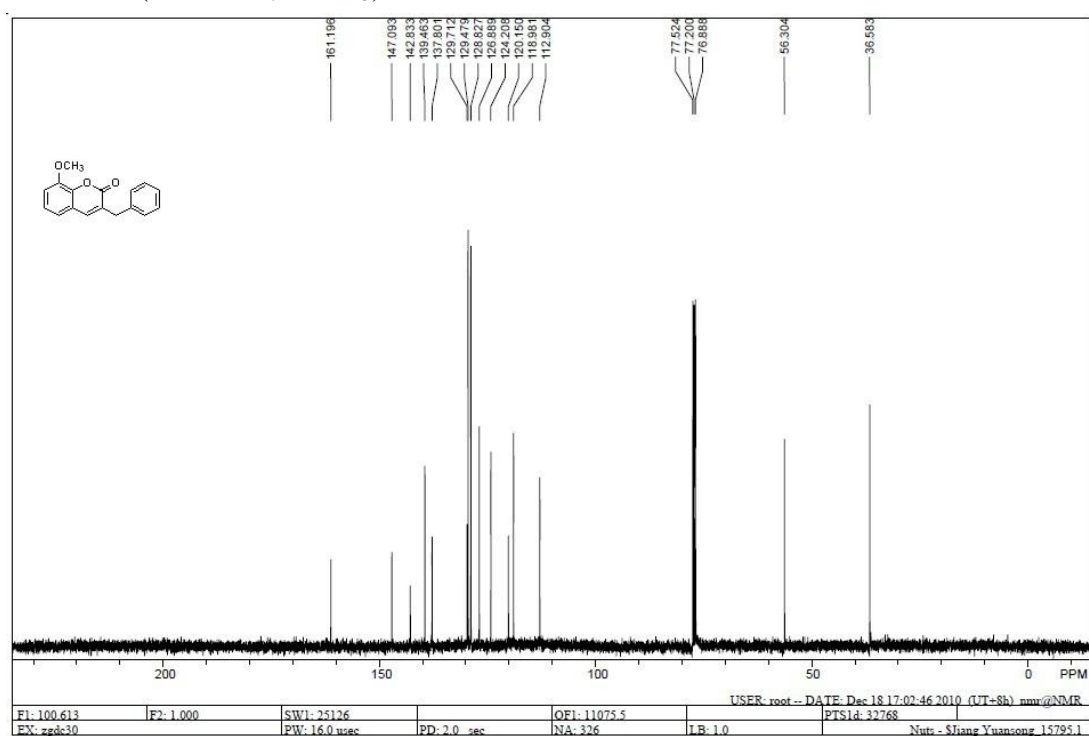

### 3-Benzyl-2H-benzo[h]chromen-2-one (4l)

<sup>1</sup>H NMR (400 MHz, CDCl<sub>3</sub>)

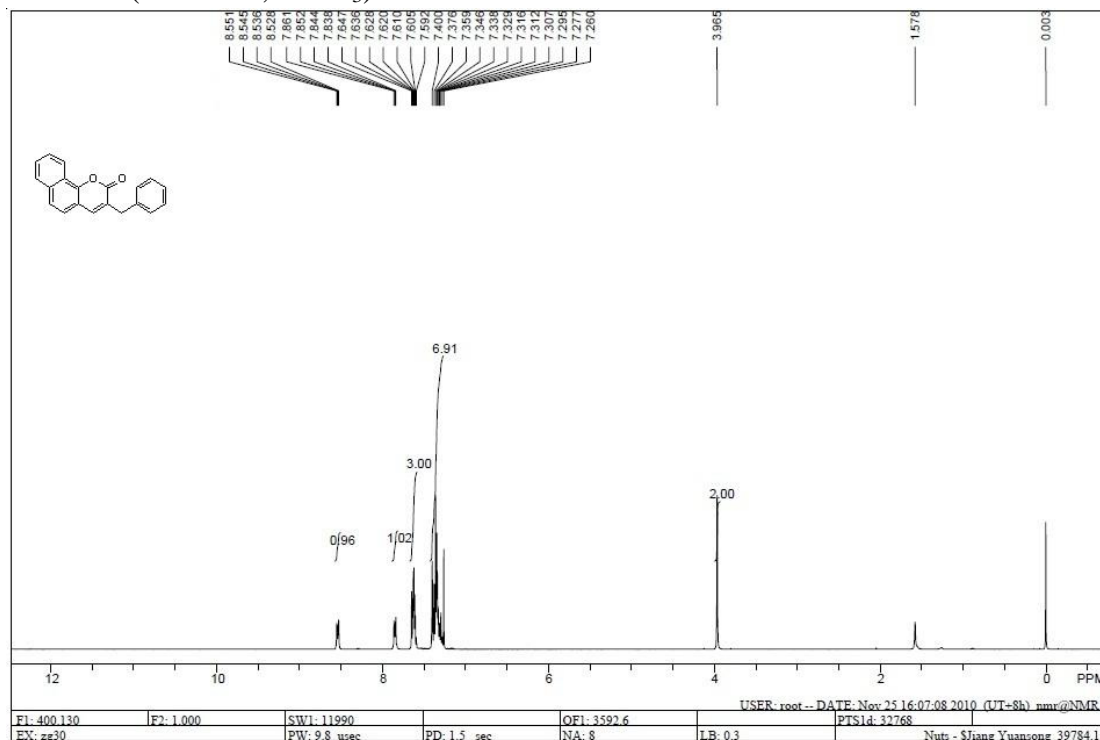

<sup>13</sup>C NMR (100 MHz, CDCl<sub>3</sub>)

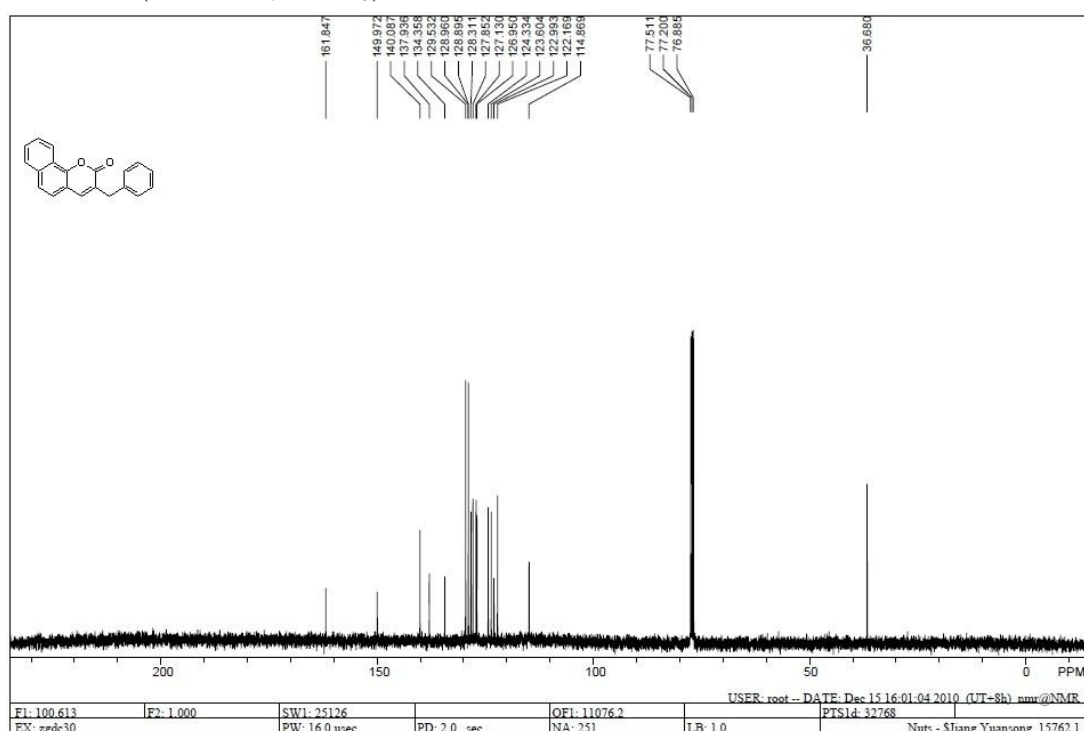

## 2-Benzyl-3*H*-benzo[*f*]chromen-3-one (4m)

<sup>1</sup>H NMR (400 MHz, CDCl<sub>3</sub>)

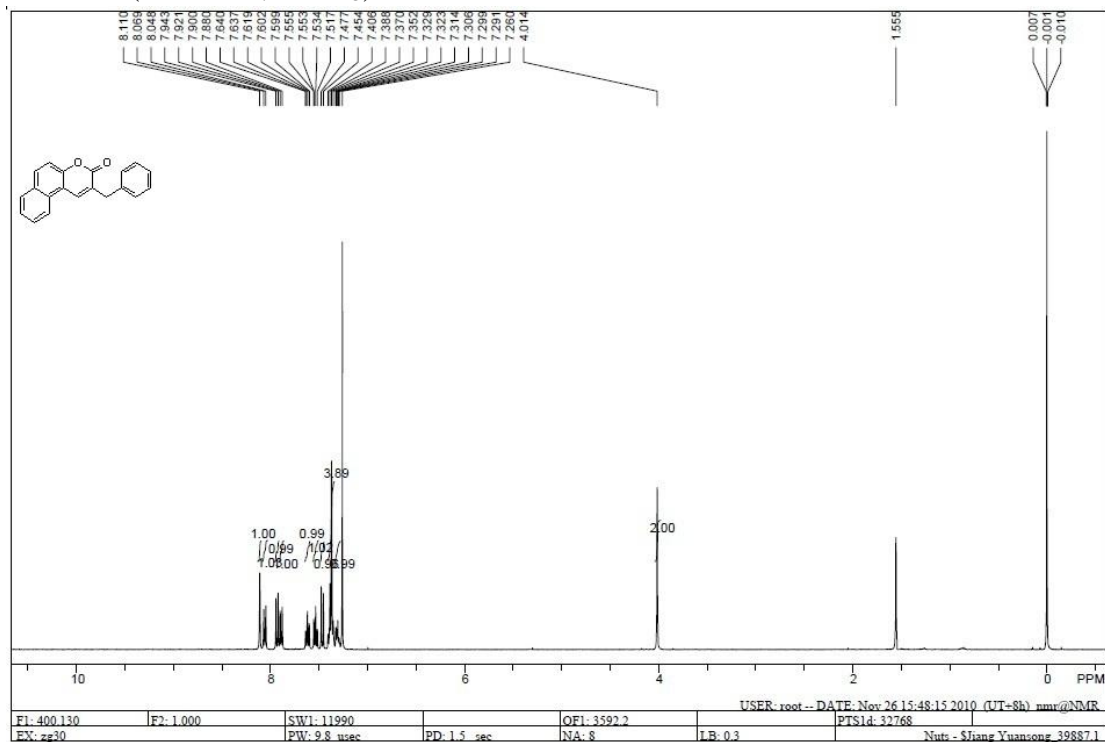

<sup>13</sup>C NMR (100 MHz, CDCl<sub>3</sub>)

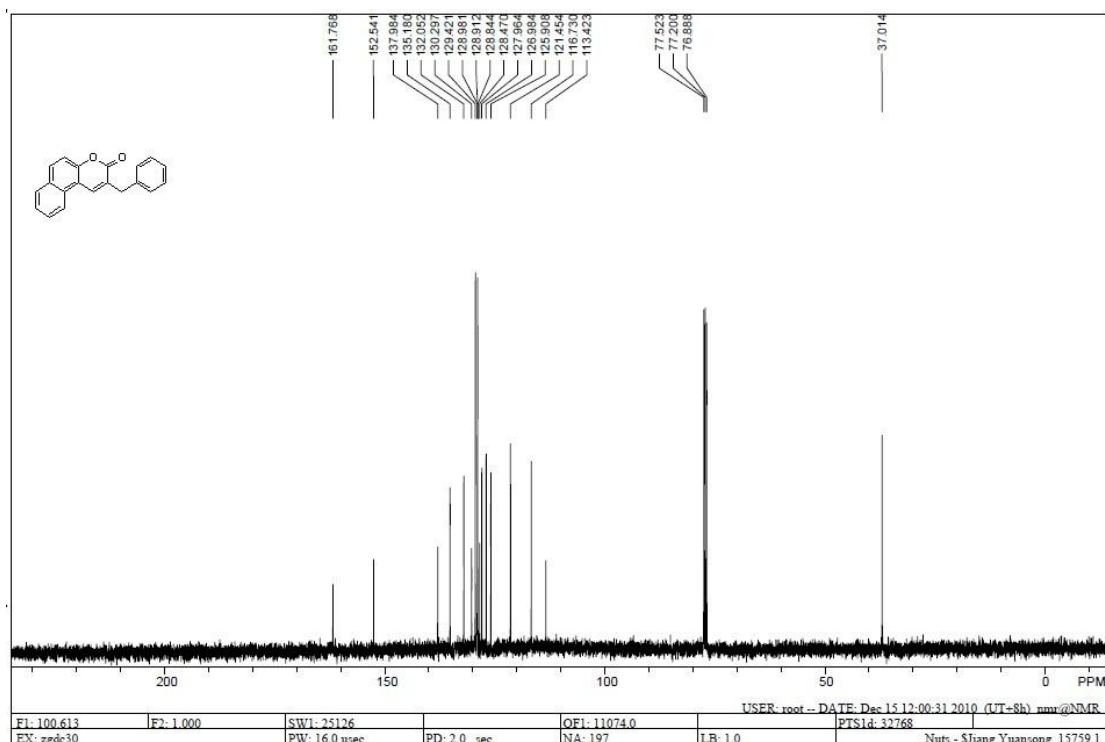



### 3-Benzyl-6-chloro-2H-chromen-2-one (4n)

<sup>1</sup>H NMR (400 MHz, CDCl<sub>3</sub>)

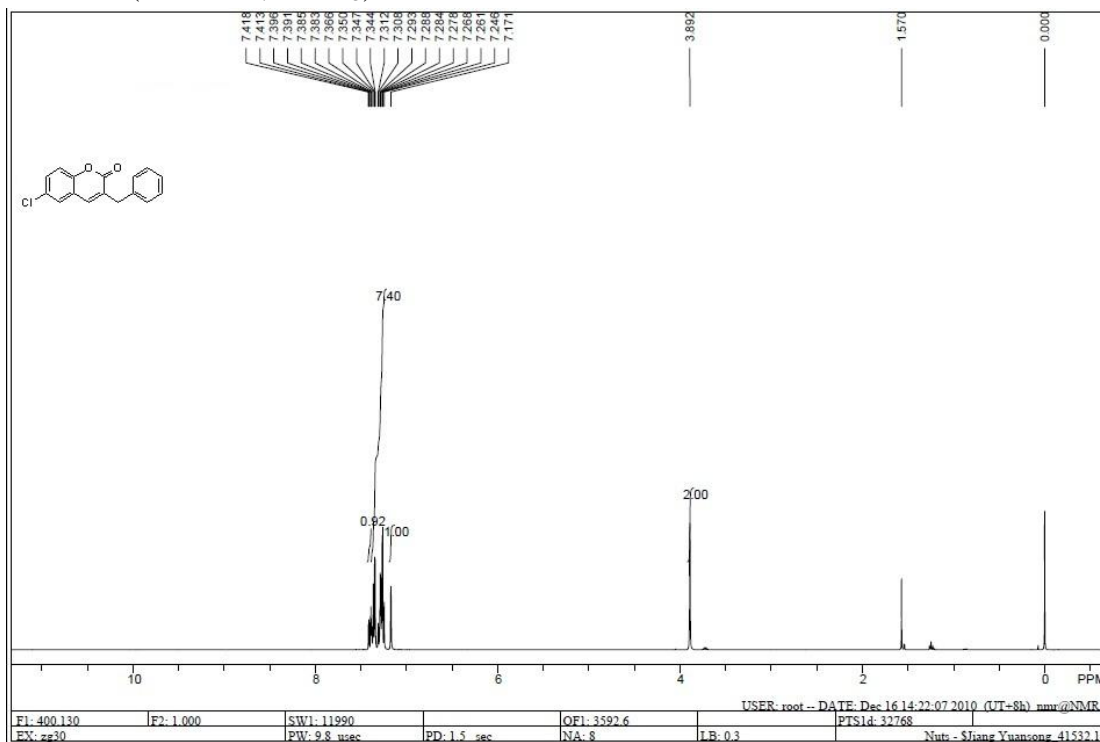

<sup>13</sup>C NMR (100 MHz, CDCl<sub>3</sub>)

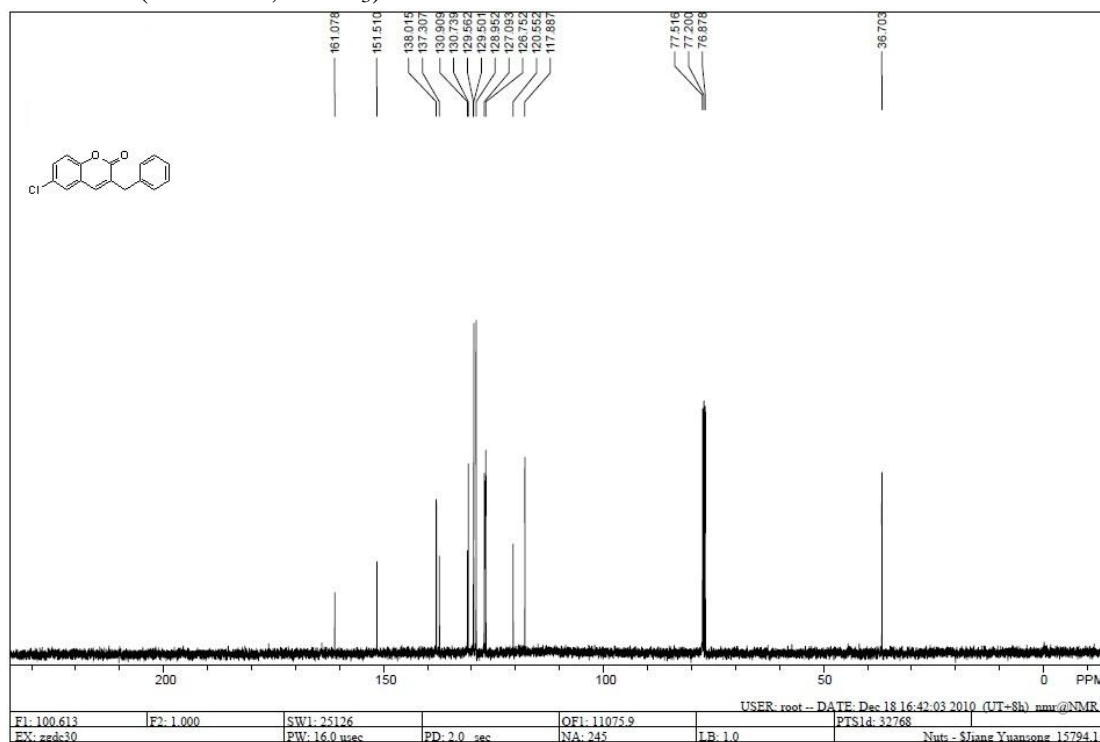

### 3-Benzyl-8-chloro-2H-chromen-2-one (4o)

<sup>1</sup>H NMR (400 MHz, CDCl<sub>3</sub>)

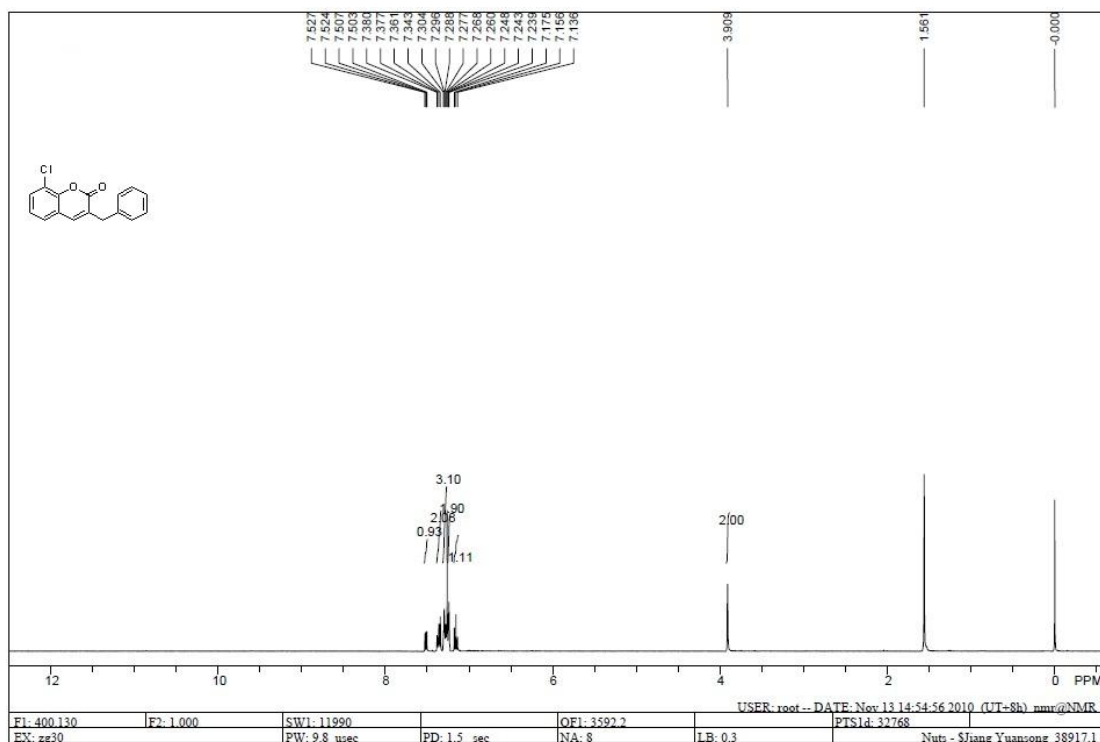

<sup>13</sup>C NMR (100 MHz, CDCl<sub>3</sub>)

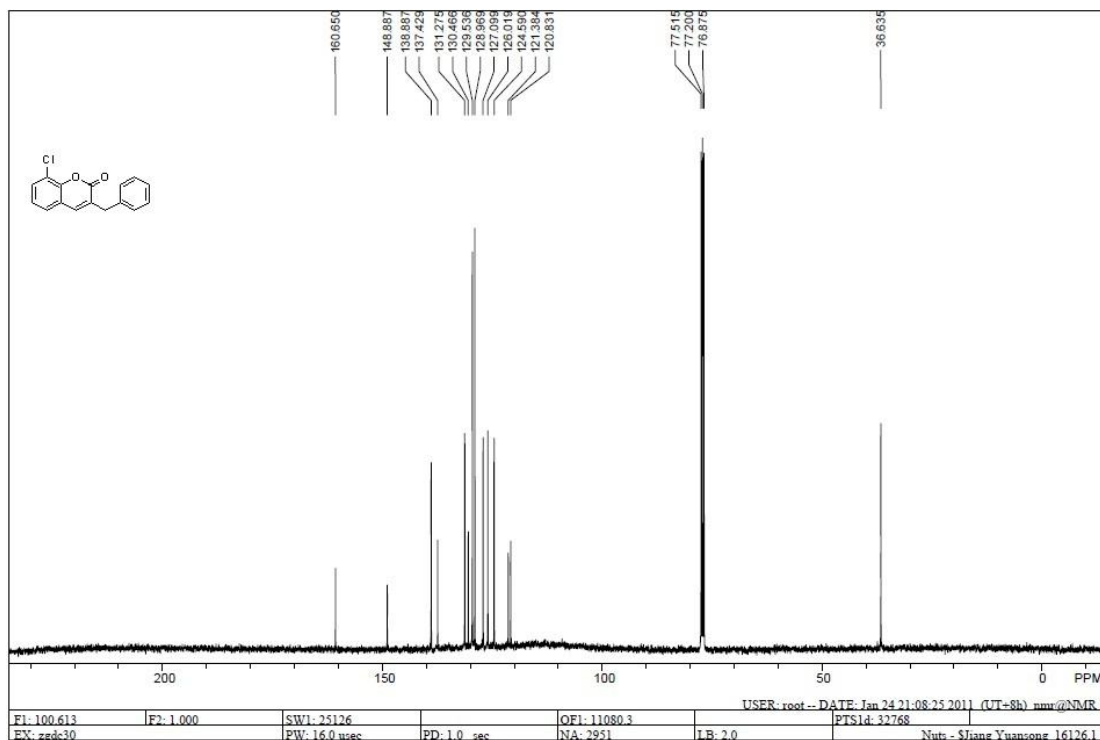

### 3-Benzyl-6-bromo-2H-chromen-2-one (4p)

<sup>1</sup>H NMR (400 MHz, CDCl<sub>3</sub>)

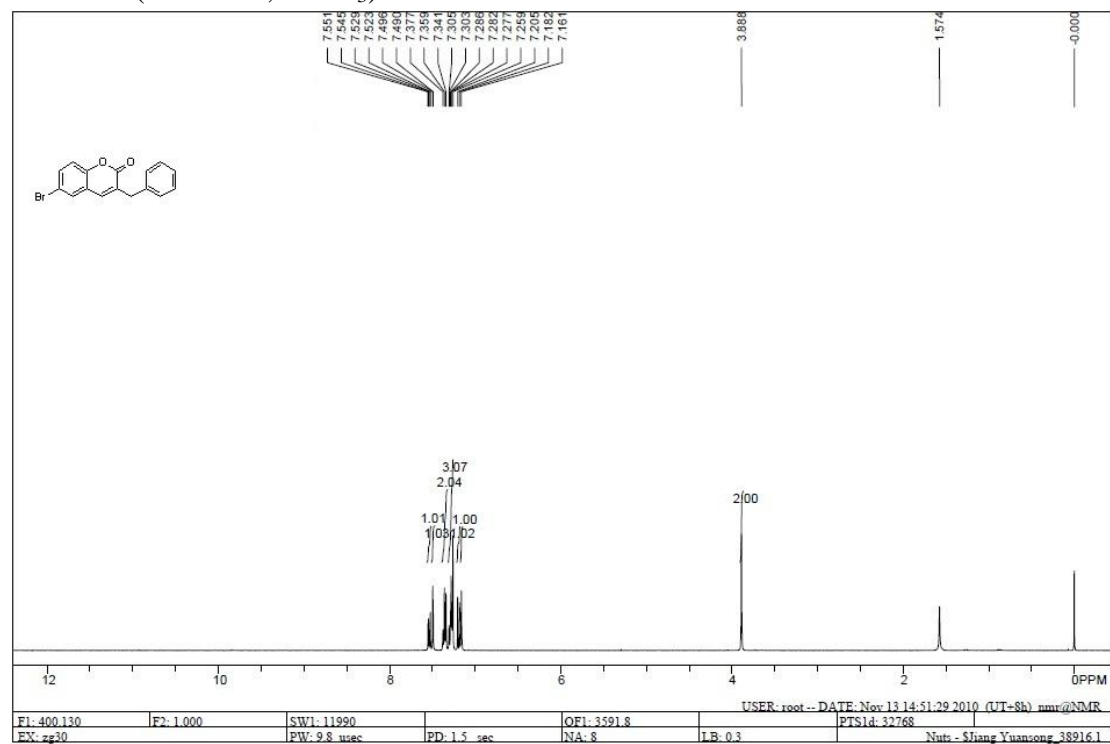

<sup>13</sup>C NMR (100 MHz, CDCl<sub>3</sub>)

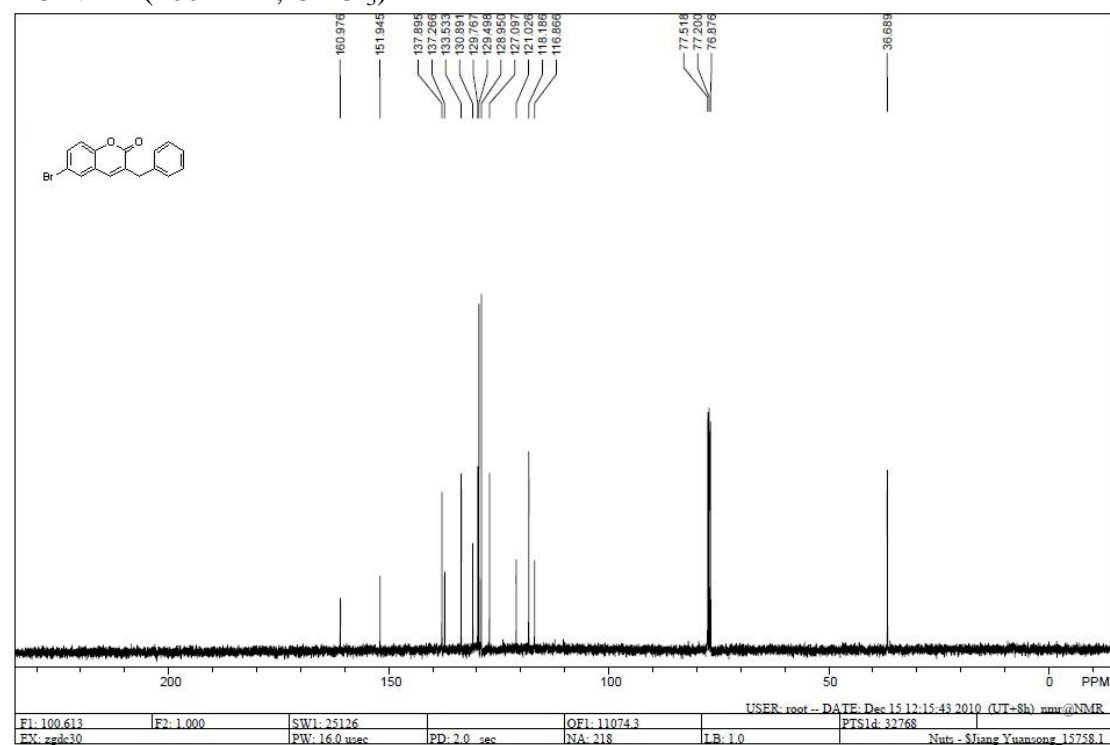

### 3-Benzyl-6-methyl-2H-chromen-2-one (4q)

<sup>1</sup>H NMR (400 MHz, CDCl<sub>3</sub>)

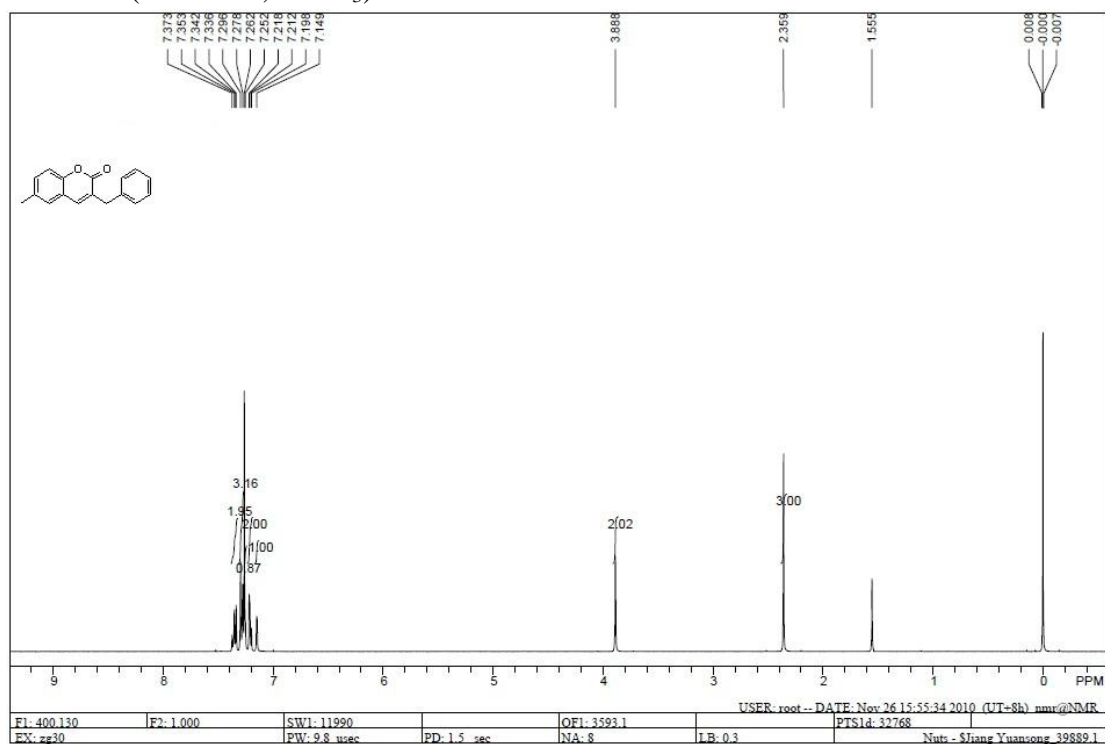

<sup>13</sup>C NMR (100 MHz, CDCl<sub>3</sub>)

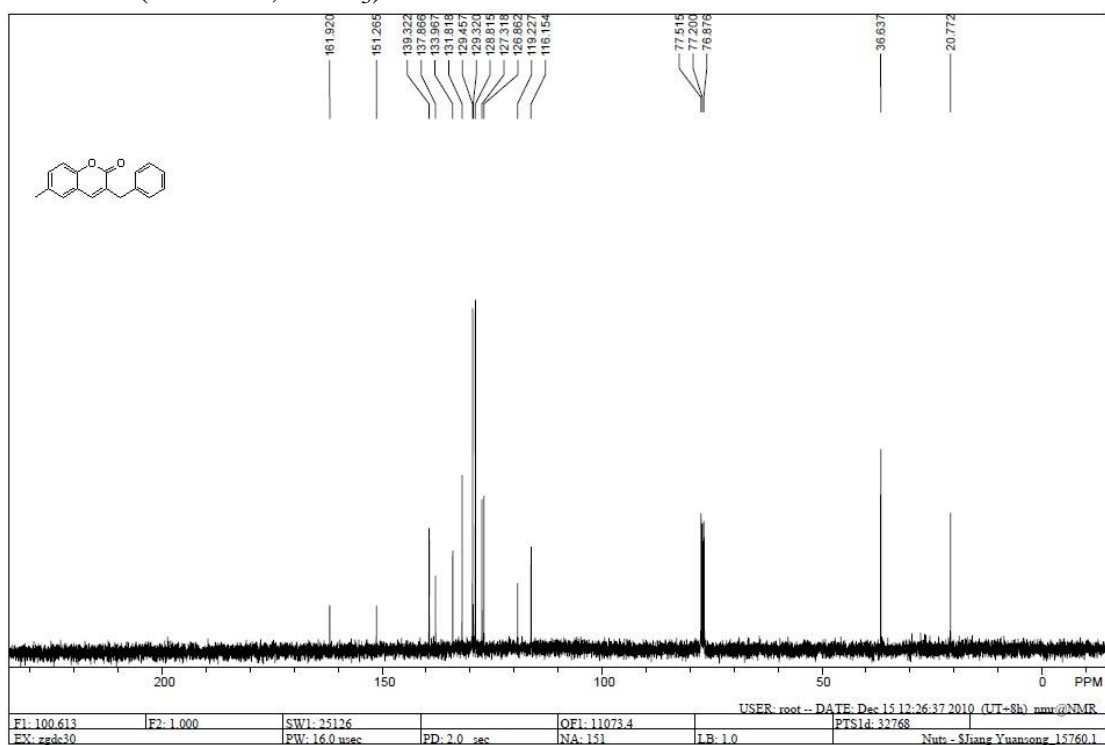

### 3-Benzyl-7-methyl-2H-chromen-2-one (4r)

<sup>1</sup>H NMR (400 MHz, CDCl<sub>3</sub>)

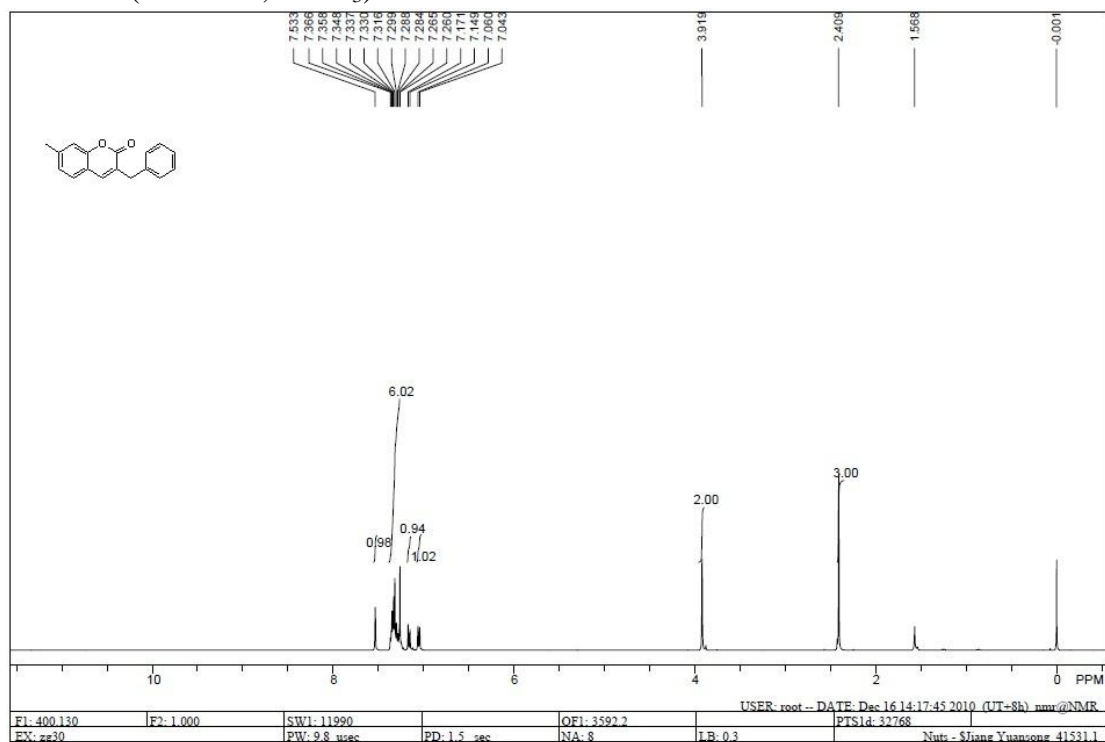

<sup>13</sup>C NMR (100 MHz, CDCl<sub>3</sub>)

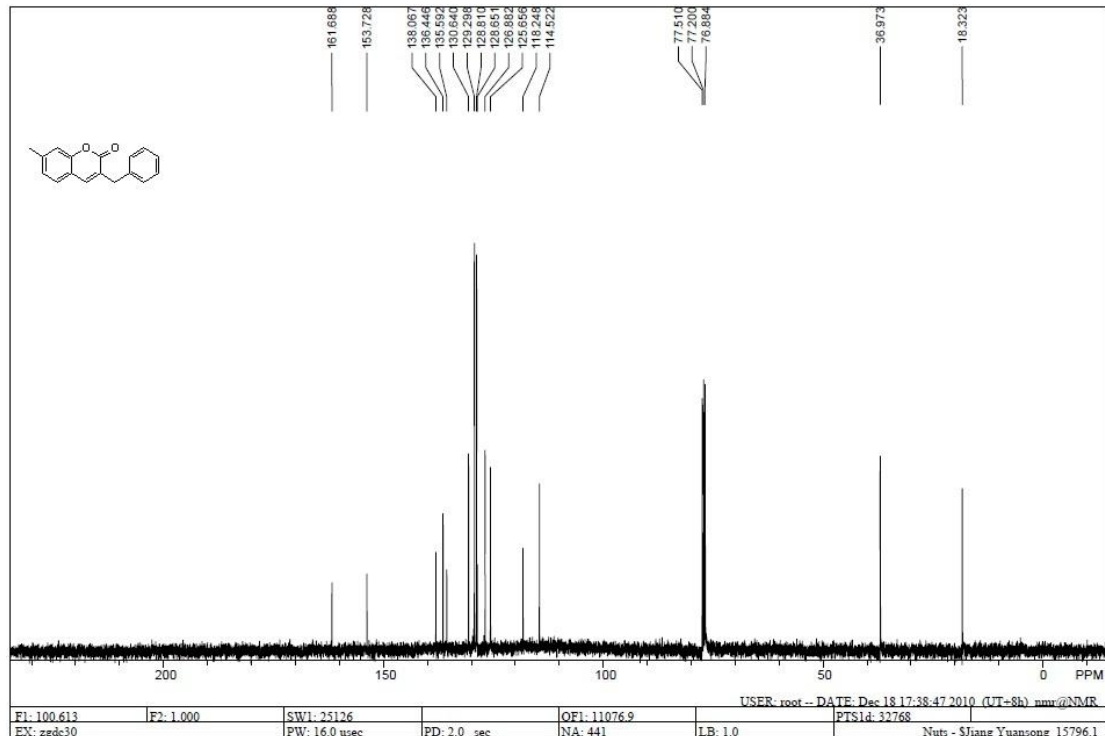

### 3-Ethyl-2H-chromen-2-one (7a)

<sup>1</sup>H NMR (400 MHz, CDCl<sub>3</sub>)

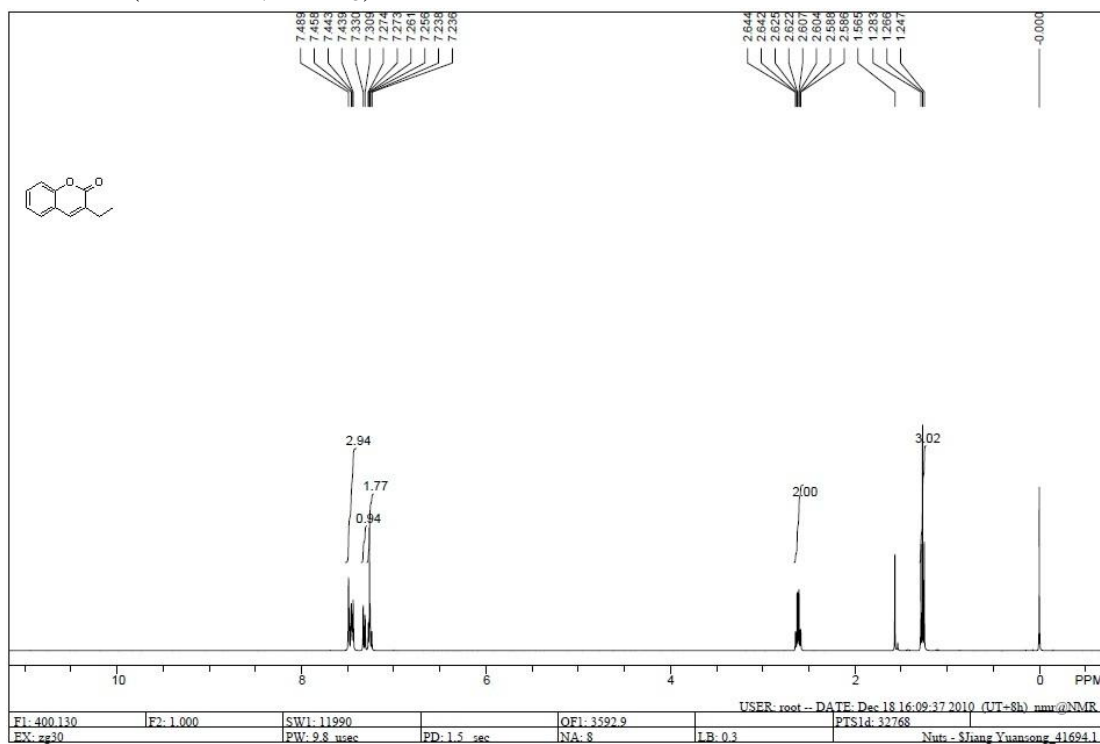

<sup>13</sup>C NMR (100 MHz, CDCl<sub>3</sub>)

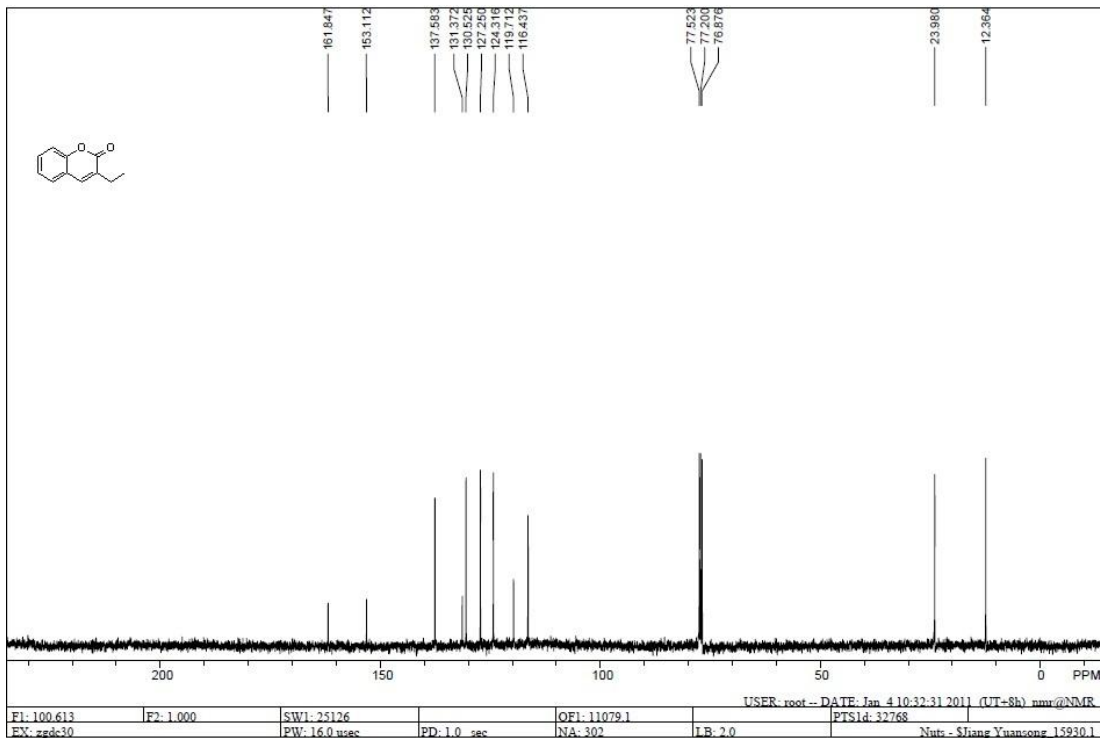

### 3-Ethyl-6-methyl-2H-chromen-2-one (7b)

$^1\text{H}$  NMR (400 MHz,  $\text{CDCl}_3$ )

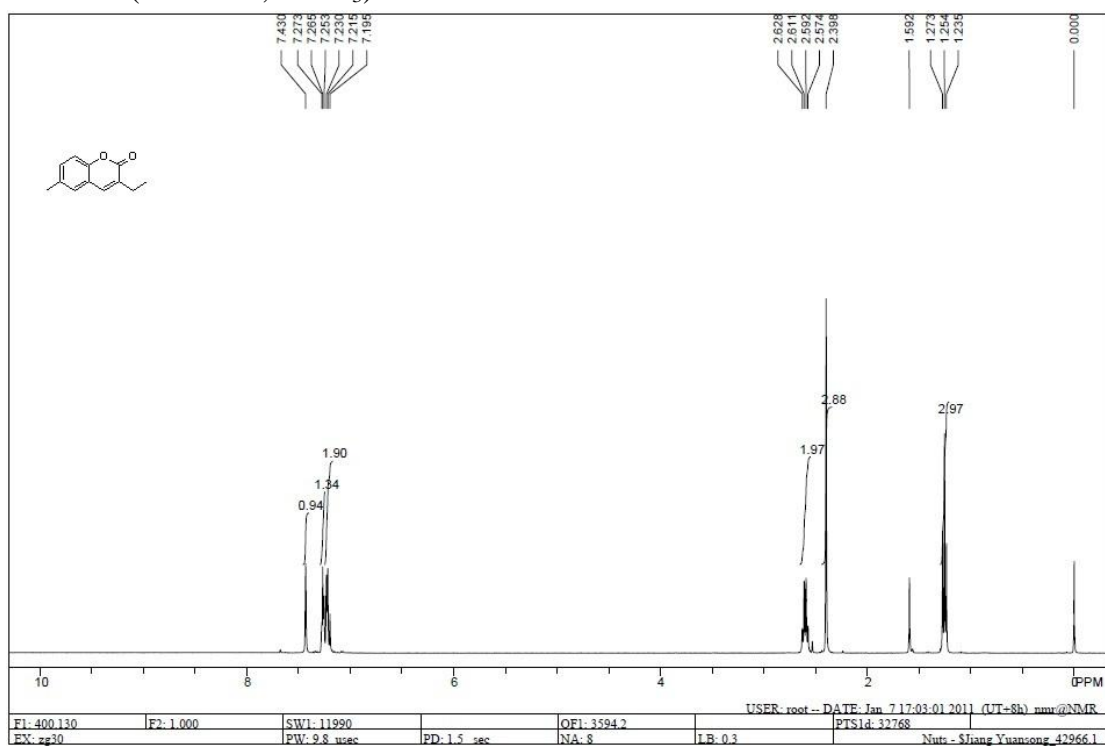

$^{13}\text{C}$  NMR (100 MHz,  $\text{CDCl}_3$ )

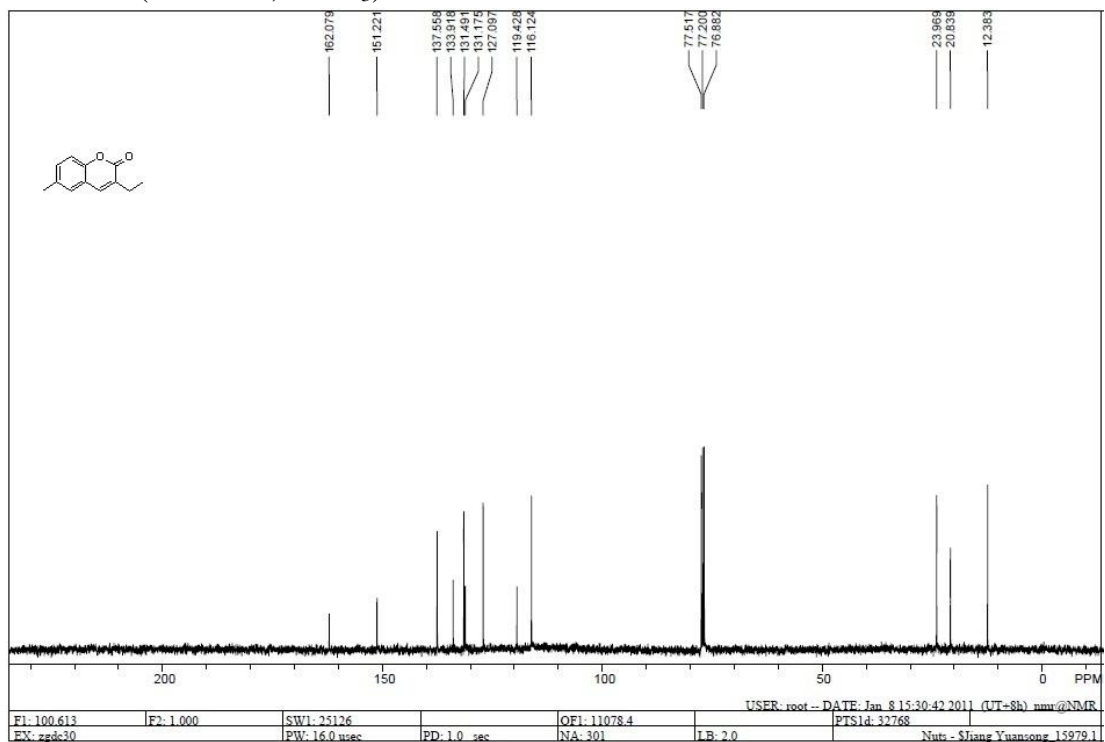

### 3-Ethyl-6-methoxy-2H-chromen-2-one (7c)

$^1\text{H}$  NMR (400 MHz,  $\text{CDCl}_3$ )

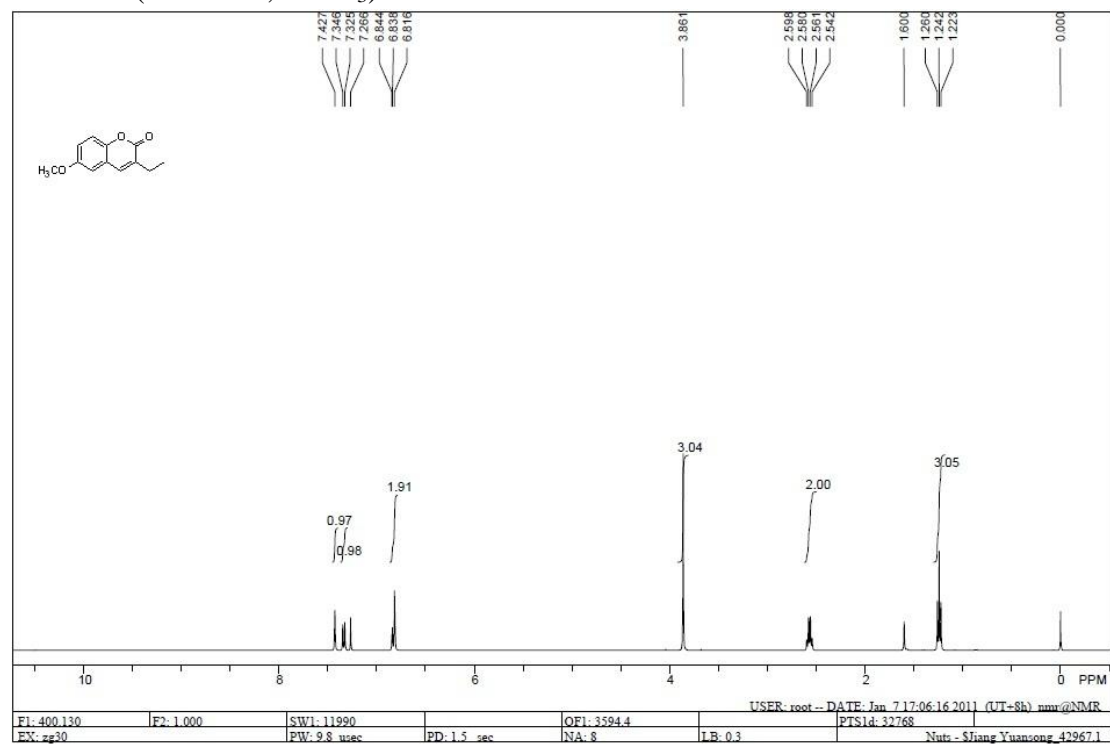

$^{13}\text{C}$  NMR (100 MHz,  $\text{CDCl}_3$ )

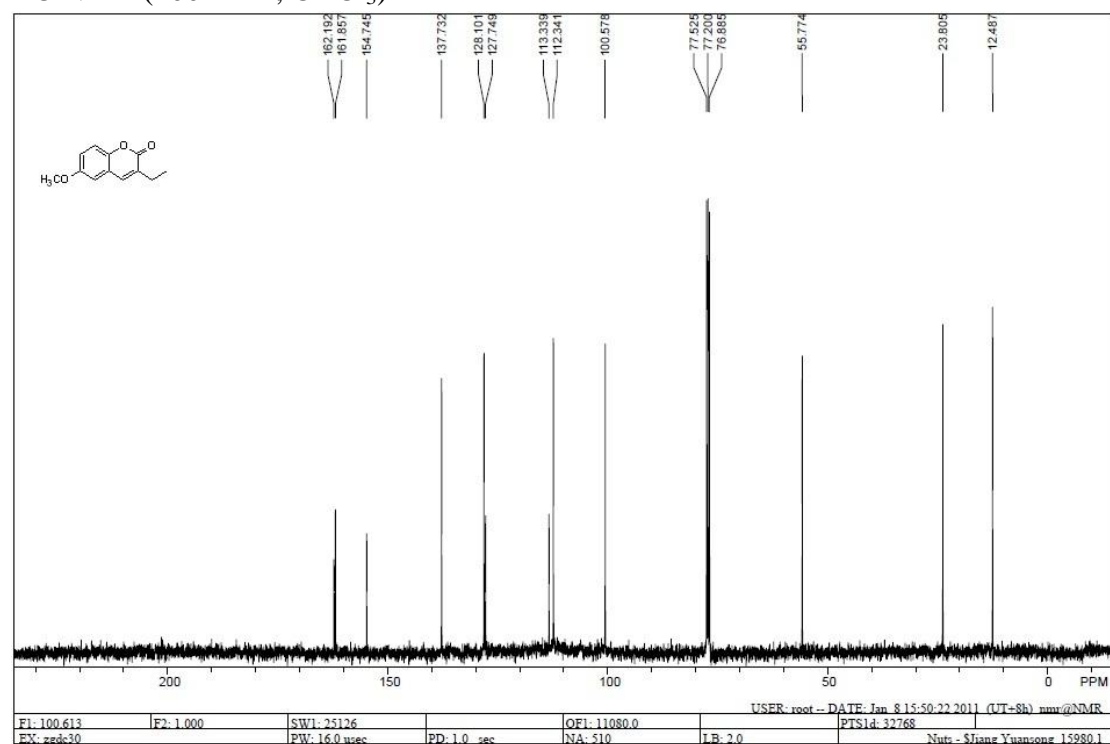



### 6-Chloro-3-ethyl-2H-chromen-2-one (7d)

<sup>1</sup>H NMR (400 MHz, CDCl<sub>3</sub>)

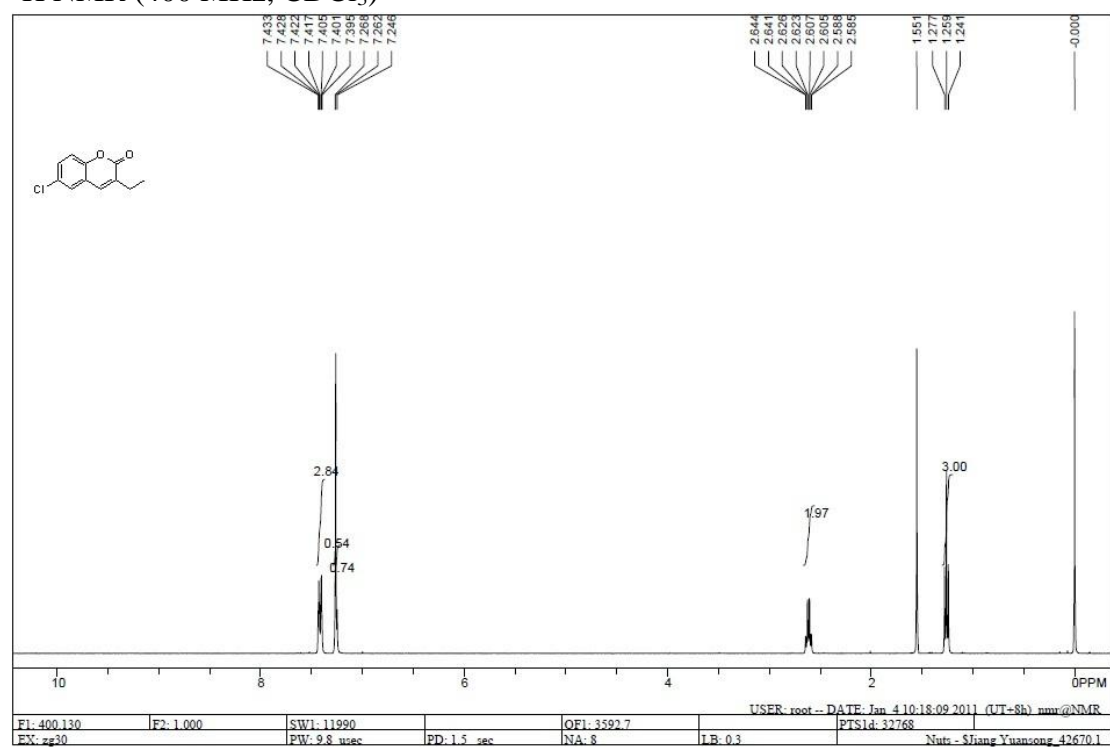

<sup>13</sup>C NMR (100 MHz, CDCl<sub>3</sub>)

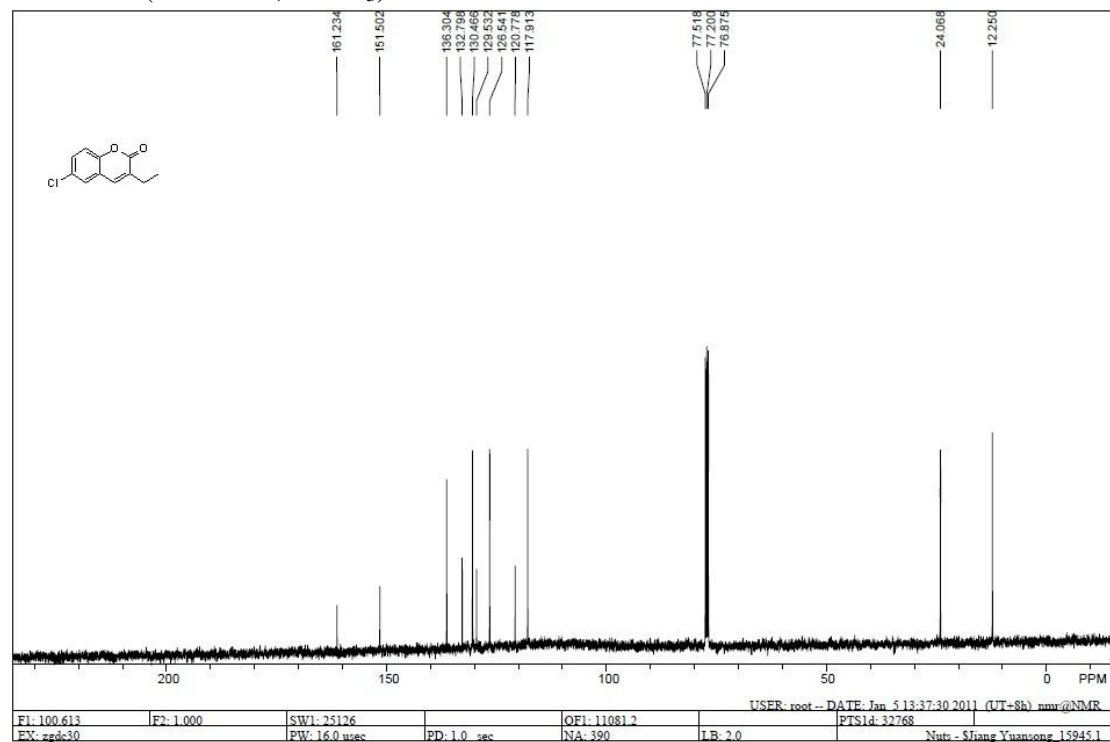

### 6-Bromo-3-ethyl-2H-chromen-2-one (7e)

$^1\text{H}$  NMR (400 MHz,  $\text{CDCl}_3$ )

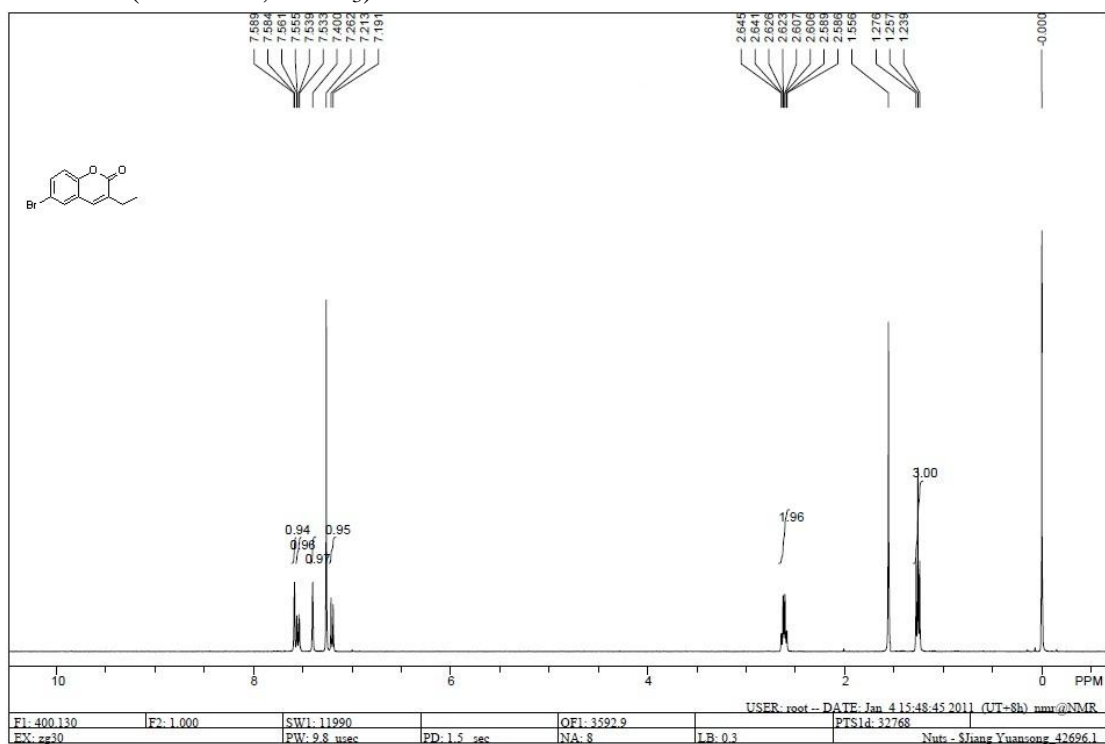

$^{13}\text{C}$  NMR (100 MHz,  $\text{CDCl}_3$ )

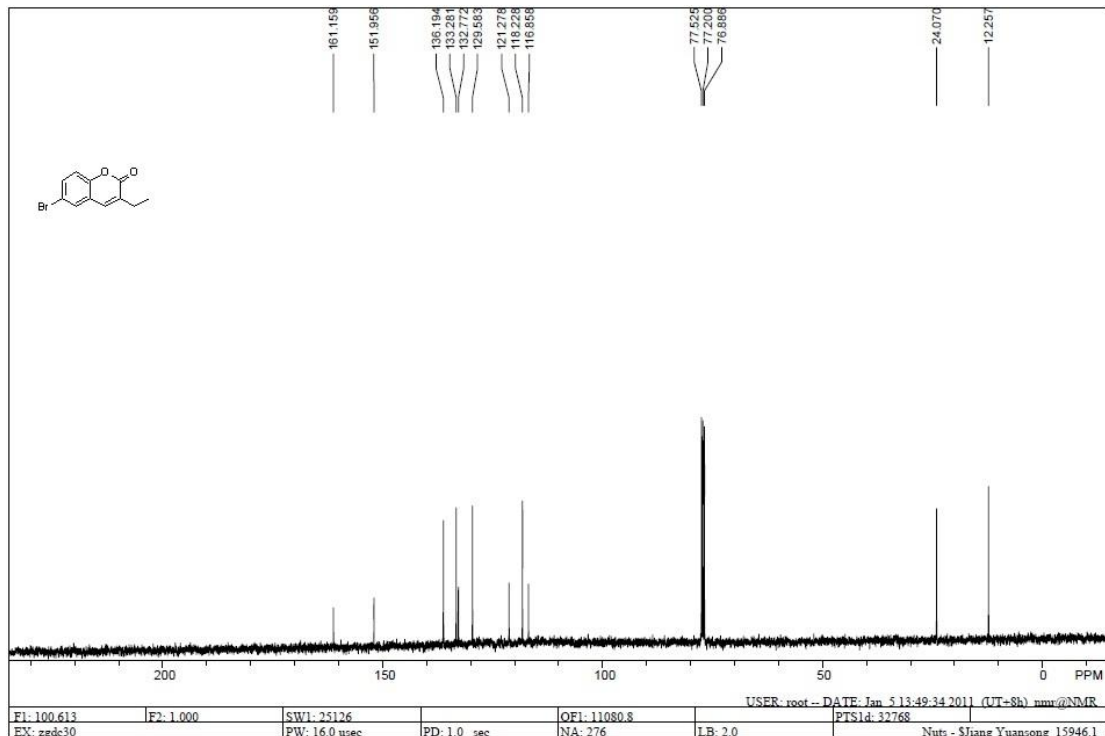

## 2-Ethyl-3H-benzo[f]chromen-3-one (7f)

<sup>1</sup>H NMR (400 MHz, CDCl<sub>3</sub>)

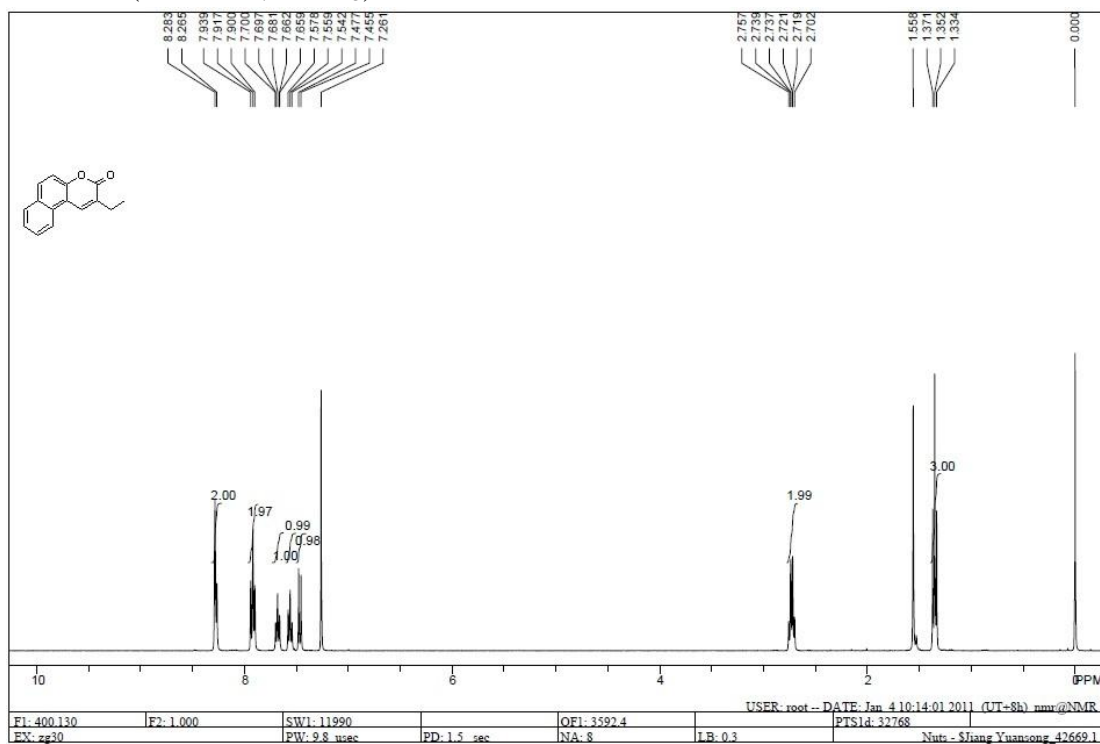

<sup>13</sup>C NMR (100 MHz, CDCl<sub>3</sub>)

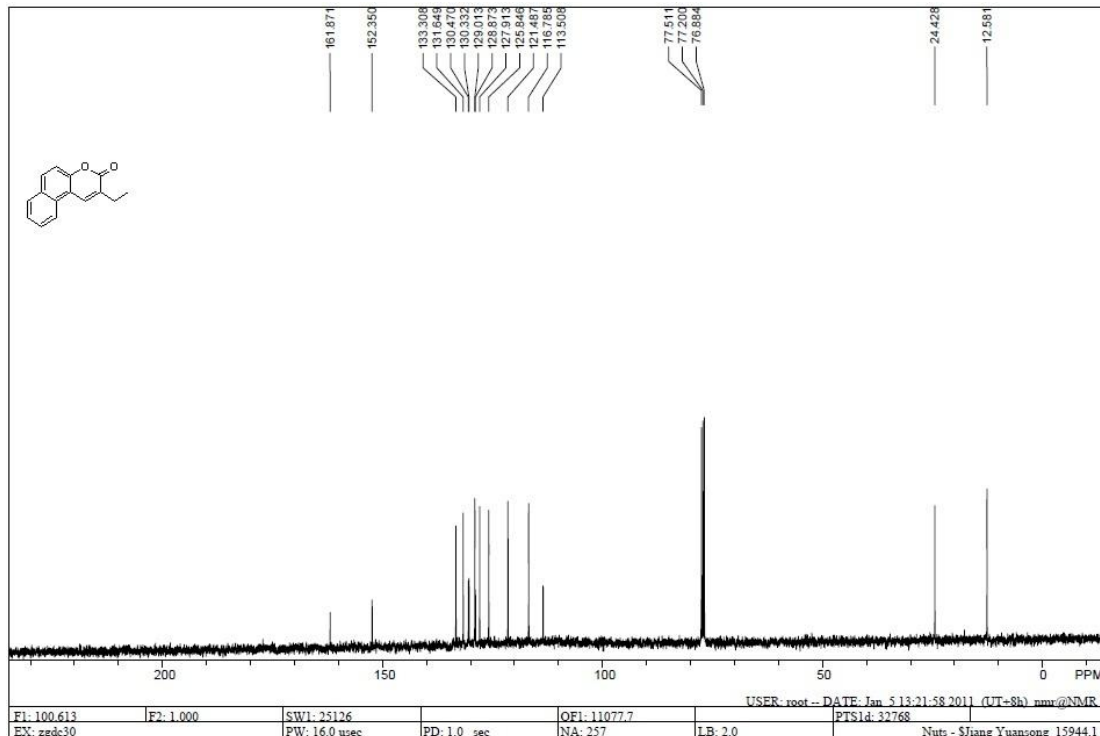

Supplement: c1ra00916h.pdf [file c1ra00916h.pdf]
